# Supplementary material
Source: publisher figshare collection journal article supplement (https://acs.figshare.com/ndownloader/files/3912853)
Supplement: Supplementary file 1 [file 3912853]

#=======================================================================
data_global
#=======================================================================

_audit_creation_method                   'Jana2006 Version : 01/07/2011'


# 1. PROCESSING SUMMARY (IUCr Office Use Only)

_journal_date_recd_electronic            ?
_journal_date_to_coeditor                ?
_journal_date_from_coeditor              ?
_journal_date_accepted                   ?
_journal_date_printers_first             ?
_journal_date_printers_final             ?
_journal_date_proofs_out                 ?
_journal_date_proofs_in                  ?
_journal_coeditor_name                   ?
_journal_coeditor_code                   ?
_journal_coeditor_notes
; ?
;
_journal_techeditor_code                 ?
_journal_paper_category                  ?
_journal_techeditor_notes
; ?
;
_journal_coden_ASTM                      ?
_journal_name_full                       'Acta Crystallographica Section C'
_journal_year                            ?
_journal_volume                          ?
_journal_issue                           ?
_journal_page_first                      ?
_journal_page_last                       ?
_journal_suppl_publ_number               ?
_journal_suppl_publ_pages                ?

#=======================================================================

# 2. SUBMISSION DETAILS

_publ_contact_author_name                ?
_publ_contact_author_address
; ?
;
_publ_contact_author_email               ?
_publ_contact_author_fax                 ?
_publ_contact_author_phone               ?

_publ_requested_journal                  'Acta Crystallographica Section C'
_publ_requested_category                 ?

_publ_contact_letter
; ?
;

#=======================================================================

# 3. TITLE AND AUTHOR LIST

_publ_section_title
; ?
;
_publ_section_title_footnote
; ?
;
loop_
 _publ_author_name
 _publ_author_footnote
 _publ_author_address
 ?       # name
; ?      # footnote
;
; ?      # address
;

#=======================================================================

# 4. TEXT

_publ_section_synopsis
; ?
;
_publ_section_abstract
; ?
;
_publ_section_comment
; ?
;
_publ_section_introduction
; ?
;
_publ_section_experimental
; ?
;
_publ_section_exptl_prep
; ?
;
_publ_section_exptl_refinement
; ?
;
_publ_section_exptl_solution
; ?
;
_publ_section_discussion
; ?
;
_publ_section_acknowledgements
; ?
;
_publ_section_references
;
Petricek, V., Dusek, M. & Palatinus L. (2006). Jana2006.
Structure Determination Software Programs.
Institute of Physics, Praha, Czech Republic.

Palatinus L. & Chapuis G. (2007). J. Appl. Cryst. 40, 786-790.

# enable this reference if Diamond ver. 2 was used for visualization
#Brandenburg, K. (1999). DIAMOND. Version. 2.1c.
#Crystal Impact GbR, Bonn, Germany.

# enable this reference if Diamond ver. 3 was used for visualization
#Brandenburg, K. & Putz, H. (2005). DIAMOND Version 3.
#Crystal Impact GbR, Postfach 1251, D-53002 Bonn, Germany.

# enable this reference if SIR97 was used for solving of the structure
#Altomare, A., Burla, M. C., Camalli, M., Cascarano, G., Giacovazzo, C.,
#Guagliardi, A., Moliterni, A. G. G., Polidori, G., Spagna, R. (1997).
#SIR97. A Package for Crystal Structure Solution by Direct Methods
#and Refinement, Bari, Rome, Italy.

# use this reference if SIR2002 was used for solving of the structure
#Burla, M.C., Camalli, M., Carrozzini, B., Cascarano, G., Giacovazzo, C.,
#Polidori, G., Spagna, R.
#SIR2002: the program, J. Appl. Cryst, (2003). 36, 1103

# enable this reference if bond valences were calculated
#Brown, I. D. (1996). J. Appl. Cryst. 29, 479-480.

# enable this reference if Xshape wase used for crystal shape refinement
#Stoe & Cie (1998). X-SHAPE. Stoe & Cie, Darmstadt, Germany.


# enable this reference if Flack coefficient was refined
#Flack, H. D. (1983). Acta Cryst. A39, 876-881.
;
_publ_section_figure_captions
; ?
;
_publ_section_table_legends
; ?
;

#=======================================================================
data_I
#=======================================================================

# 5. CHEMICAL DATA

_chemical_name_systematic
; ?
;
_chemical_name_common                    ?
_chemical_formula_moiety                 ?
_chemical_formula_structural             ?
_chemical_formula_analytical             ?
_chemical_formula_iupac                  ?
_chemical_formula_sum                    'Bi2 Co1 O7 S1'
_chemical_formula_weight                 620.9
_chemical_melting_point                  ?
_chemical_compound_source                ?
_chemical_absolute_configuration         .

#=======================================================================

# 6. CRYSTAL DATA

_symmetry_cell_setting                   orthorhombic
_symmetry_space_group_name_H-M           'P b c a'
_symmetry_space_group_name_Hall          '-P -2xab;-2ybc;-2zac'
_symmetry_Int_Tables_number              61
loop_
 _symmetry_equiv_pos_site_id
 _symmetry_equiv_pos_as_xyz
 1   x,y,z
 2   -x+1/2,-y,z+1/2
 3   -x,y+1/2,-z+1/2
 4   x+1/2,-y+1/2,-z
 5   -x,-y,-z
 6   x+1/2,y,-z+1/2
 7   x,-y+1/2,z+1/2
 8   -x+1/2,y+1/2,z
_cell_length_a                           5.4153(2)
_cell_length_b                           14.2437(6)
_cell_length_c                           15.7595(7)
_cell_angle_alpha                        90
_cell_angle_beta                         90
_cell_angle_gamma                        90
_cell_volume                             1215.59(9)

loop_
 _jana_cell_twin_matrix_id
 _jana_cell_twin_volume_fraction
 _jana_cell_twin_matrix_1_1
 _jana_cell_twin_matrix_1_2
 _jana_cell_twin_matrix_1_3
 _jana_cell_twin_matrix_2_1
 _jana_cell_twin_matrix_2_2
 _jana_cell_twin_matrix_2_3
 _jana_cell_twin_matrix_3_1
 _jana_cell_twin_matrix_3_2
 _jana_cell_twin_matrix_3_3
 ? ? ? ? ? ? ? ? ? ? ?
_cell_formula_units_Z                    8

_cell_measurement_reflns_used            ?
_cell_measurement_theta_min              ?
_cell_measurement_theta_max              ?
_cell_measurement_temperature            293
_cell_special_details
; ?
;

_exptl_crystal_density_diffrn            6.7837
_exptl_crystal_density_meas              ?
_exptl_crystal_density_method            ?
_exptl_crystal_F_000                     2120

_exptl_absorpt_coefficient_mu            60.790
_exptl_crystal_description               'transparent'
_exptl_crystal_size_max                  0.380
_exptl_crystal_size_mid                  0.250
_exptl_crystal_size_min                  0.180
_exptl_crystal_size_rad                  ?
_exptl_crystal_colour                    'purple'
_exptl_absorpt_correction_type           'multi-scan'
_exptl_absorpt_process_details           'Bruker'
_exptl_absorpt_correction_T_min          0.3272
_exptl_absorpt_correction_T_max          0.7465

#=======================================================================

# 7. EXPERIMENTAL DATA

_exptl_special_details                   ?

_diffrn_ambient_temperature              293
_diffrn_source                           ?
_diffrn_source_power                     ?
_diffrn_source_voltage                   ?
_diffrn_source_current                   ?
_diffrn_radiation_type                   'Mo K\a'
_diffrn_radiation_source                 'X-ray tube'
_diffrn_radiation_wavelength             0.71073
_diffrn_radiation_monochromator          graphite
_diffrn_measurement_device               'four-cycle diffractometer'
_diffrn_measurement_device_type          'Bruker CCD'
_diffrn_detector                         ?
_diffrn_detector_area_resol_mean         ?
_diffrn_measurement_method               ?
_diffrn_measurement_specimen_support     ?

_diffrn_reflns_number                    30725
_diffrn_reflns_theta_min                 2.58
_diffrn_reflns_theta_max                 33.07
_diffrn_reflns_theta_full                33.07
_diffrn_measured_fraction_theta_max      1
_diffrn_measured_fraction_theta_full     1
_diffrn_reflns_av_R_equivalents          0.0364
_diffrn_reflns_av_sigmaI/netI            0.0161
_diffrn_reflns_limit_h_min               -8
_diffrn_reflns_limit_h_max               8
_diffrn_reflns_limit_k_min               -21
_diffrn_reflns_limit_k_max               21
_diffrn_reflns_limit_l_min               -23
_diffrn_reflns_limit_l_max               24
_diffrn_reflns_reduction_process         ?

_diffrn_standards_number                 ?
_diffrn_standards_interval_count         ?
_diffrn_standards_interval_time          ?
_diffrn_standards_decay_%                ?
loop_
_diffrn_standard_refln_index_h
_diffrn_standard_refln_index_k
_diffrn_standard_refln_index_l
  ? ? ?

#=======================================================================

# 8. REFINEMENT DATA

_refine_special_details
; ?
;

_reflns_number_total                     2310
_reflns_number_gt                        2085
_reflns_threshold_expression             'I>2\s(I)'

_refine_ls_structure_factor_coef         F
_refine_ls_R_factor_gt                   0.0220
_refine_ls_wR_factor_gt                  0.0264
_refine_ls_R_factor_all                  0.0256
_refine_ls_wR_factor_ref                 0.0268
_refine_ls_goodness_of_fit_ref           1.57
_refine_ls_goodness_of_fit_gt            1.63
_refine_ls_restrained_S_gt               ?
_refine_ls_restrained_S_all              ?
_refine_ls_number_reflns                 2310
_refine_ls_number_parameters             100
_refine_ls_number_restraints             0
_refine_ls_number_constraints            0
_refine_ls_weighting_scheme              sigma
_refine_ls_weighting_details             'w=1/(\s^2^(F)+0.0001F^2^)'
_refine_ls_hydrogen_treatment            ?
_refine_ls_shift/su_max                  0.0413
_refine_ls_shift/su_mean                 0.0020
_refine_diff_density_max                 1.24
_refine_diff_density_min                 -5.76
_refine_ls_extinction_method             'none'
_refine_ls_extinction_coef               ?
_refine_ls_abs_structure_details         ?
_refine_ls_abs_structure_Flack           ?
_refine_ls_abs_structure_Rogers          ?

loop_
 _atom_type_symbol
 _atom_type_scat_dispersion_real
 _atom_type_scat_dispersion_imag
 _atom_type_scat_source
 _atom_type_scat_Cromer_Mann_a1
 _atom_type_scat_Cromer_Mann_b1
 _atom_type_scat_Cromer_Mann_a2
 _atom_type_scat_Cromer_Mann_b2
 _atom_type_scat_Cromer_Mann_a3
 _atom_type_scat_Cromer_Mann_b3
 _atom_type_scat_Cromer_Mann_a4
 _atom_type_scat_Cromer_Mann_b4
 _atom_type_scat_Cromer_Mann_c
 Bi -4.1077 10.2566
 'International Tables Vol C tables 4.2.6.8 and 6.1.1.4'
33.3689 0.704 12.951 2.9238 16.5877 8.7937 6.4692 48.0093 13.5782
 Co  0.3494  0.9721
 'International Tables Vol C tables 4.2.6.8 and 6.1.1.4'
12.2841 4.2791 7.3409 0.2784 4.0034 13.5359 2.3488 71.169197 1.0118
 O   0.0106  0.0060
 'International Tables Vol C tables 4.2.6.8 and 6.1.1.4'
3.0485 13.2771 2.2868 5.7011 1.5463 0.3239 0.867 32.908901 0.2508
 S   0.1246  0.1234
 'International Tables Vol C tables 4.2.6.8 and 6.1.1.4'
6.9053 1.4679 5.2034 22.215099 1.4379 0.2536 1.5863 56.172001 0.8669

_computing_data_collection               ?
_computing_cell_refinement               ?
_computing_data_reduction                ?
_computing_structure_solution            ?
_computing_structure_refinement          ?
_computing_molecular_graphics            ?
_computing_publication_material          ?

#=======================================================================

# 9. ATOMIC COORDINATES AND DISPLACEMENT PARAMETERS

loop_
 _atom_site_label
 _atom_site_type_symbol
 _atom_site_fract_x
 _atom_site_fract_y
 _atom_site_fract_z
 _atom_site_adp_type
 _atom_site_U_iso_or_equiv
 _atom_site_symmetry_multiplicity
 _atom_site_occupancy
 _atom_site_calc_flag
 _atom_site_refinement_flags
 _atom_site_disorder_assembly
 _atom_site_disorder_group
  Bi1 Bi 0.22545(3) 0.881270(13) 0.342423(10) Uani 0.00804(5) 8 1 d . . .
  Bi2 Bi 0.25175(2) 1.084036(13) 0.480860(10) Uani 0.00832(5) 8 1 d . . .
  Co Co 0.22810(10) 1.01816(5) 0.17429(4) Uani 0.00996(16) 8 1 d . . .
  S S 0.29234(19) 1.20640(9) 0.11237(8) Uani 0.0123(3) 8 1 d . . .
  O1 O -0.0160(5) 0.9802(2) 0.41725(17) Uani 0.0101(8) 8 1 d . . .
  O2 O 0.4699(5) 0.9709(2) 0.42040(18) Uani 0.0099(8) 8 1 d . . .
  O3 O 0.4742(5) 0.9536(3) 0.25093(17) Uani 0.0095(8) 8 1 d . . .
  O4 O 0.2514(6) 1.3063(3) 0.1326(3) Uani 0.0217(11) 8 1 d . . .
  O5 O 0.3010(7) 1.1927(3) 0.0199(2) Uani 0.0236(12) 8 1 d . . .
  O6 O 0.0870(7) 1.1491(3) 0.1470(2) Uani 0.0246(11) 8 1 d . . .
  O7 O 0.5249(7) 1.1743(3) 0.1504(2) Uani 0.0318(13) 8 1 d . . .

loop_
 _atom_site_aniso_label
 _atom_site_aniso_type_symbol
 _atom_site_aniso_U_11
 _atom_site_aniso_U_22
 _atom_site_aniso_U_33
 _atom_site_aniso_U_12
 _atom_site_aniso_U_13
 _atom_site_aniso_U_23
 Bi1 Bi 0.00899(7) 0.00674(9) 0.00839(8) 0.00056(5) 0.00000(5) -0.00003(6)
 Bi2 Bi 0.00914(8) 0.00768(9) 0.00815(8) 0.00061(5) 0.00049(5) 0.00030(6)
 Co Co 0.0086(2) 0.0129(3) 0.0084(2) 0.0015(2) 0.00040(17) 0.0015(2)
 S S 0.0145(4) 0.0080(5) 0.0142(5) 0.0012(4) -0.0001(4) -0.0015(4)
 O1 O 0.0087(12) 0.0128(16) 0.0089(13) 0.0007(12) -0.0009(10) -0.0008(13)
 O2 O 0.0101(13) 0.0099(15) 0.0099(13) -0.0003(12) -0.0012(10) -0.0015(13)
 O3 O 0.0078(12) 0.0106(17) 0.0101(14) -0.0004(11) -0.0001(10) -0.0007(13)
 O4 O 0.0265(19) 0.0073(18) 0.031(2) 0.0010(13) 0.0066(14) -0.0036(17)
 O5 O 0.0293(18) 0.027(2) 0.0150(18) 0.0064(18) -0.0008(14) -0.0044(16)
 O6 O 0.032(2) 0.0129(19) 0.029(2) -0.0087(17) 0.0088(16) 0.0002(17)
 O7 O 0.026(2) 0.042(3) 0.028(2) 0.0183(19) -0.0097(16) -0.010(2)


#=======================================================================

# 10. MOLECULAR GEOMETRY


loop_
 _geom_bond_atom_site_label_1
 _geom_bond_atom_site_label_2
 _geom_bond_site_symmetry_1
 _geom_bond_site_symmetry_2
 _geom_bond_distance
 _geom_bond_publ_flag
  Bi1 O1 . . 2.256(3) ?
  Bi1 O2 . . 2.212(3) ?
  Bi1 O3 . . 2.226(3) ?
  Bi1 O3 . 6_455 2.253(3) ?
  Bi2 O1 . . 2.301(3) ?
  Bi2 O1 . 5_576 2.246(3) ?
  Bi2 O2 . . 2.214(3) ?
  Bi2 O2 . 5_676 2.303(3) ?
  Co O1 . 6_555 2.073(3) ?
  Co O3 . . 2.020(3) ?
  Co O3 . 6_455 2.031(3) ?
  Co O6 . . 2.061(4) ?
  S O4 . . 1.475(4) ?
  S O5 . . 1.471(3) ?
  S O6 . . 1.483(4) ?
  S O7 . . 1.468(4) ?

loop_
 _geom_angle_atom_site_label_1
 _geom_angle_atom_site_label_2
 _geom_angle_atom_site_label_3
 _geom_angle_site_symmetry_1
 _geom_angle_site_symmetry_2
 _geom_angle_site_symmetry_3
 _geom_angle
 _geom_angle_publ_flag
  O1 Bi1 O2 . . . 72.28(10) ?
  O1 Bi1 O3 . . . 113.61(13) ?
  O1 Bi1 O3 . . 6_455 72.89(12) ?
  O2 Bi1 O3 . . . 74.38(12) ?
  O2 Bi1 O3 . . 6_455 117.40(13) ?
  O3 Bi1 O3 . . 6_455 74.39(11) ?
  O1 Bi2 O1 . . 5_576 72.00(11) ?
  O1 Bi2 O2 . . . 71.39(10) ?
  O1 Bi2 O2 . . 5_676 119.22(10) ?
  O1 Bi2 O2 5_576 . . 108.32(11) ?
  O1 Bi2 O2 5_576 . 5_676 75.57(10) ?
  O2 Bi2 O2 . . 5_676 72.20(11) ?
  O1 Co O3 6_555 . . 81.74(12) ?
  O1 Co O3 6_555 . 6_455 137.62(14) ?
  O1 Co O6 6_555 . . 109.79(13) ?
  O3 Co O3 . . 6_455 83.89(13) ?
  O3 Co O6 . . . 141.39(16) ?
  O3 Co O6 6_455 . . 106.25(15) ?
  O4 S O5 . . . 110.3(3) ?
  O4 S O6 . . . 109.8(2) ?
  O4 S O7 . . . 109.9(2) ?
  O5 S O6 . . . 108.4(2) ?
  O5 S O7 . . . 109.6(2) ?
  O6 S O7 . . . 108.8(2) ?

loop_
 _geom_torsion_atom_site_label_1
 _geom_torsion_atom_site_label_2
 _geom_torsion_atom_site_label_3
 _geom_torsion_atom_site_label_4
 _geom_torsion_site_symmetry_1
 _geom_torsion_site_symmetry_2
 _geom_torsion_site_symmetry_3
 _geom_torsion_site_symmetry_4
 _geom_torsion
 _geom_torsion_publ_flag
 ? ? ? ? ? ? ? ? ? ?

loop_
 _geom_hbond_atom_site_label_D
 _geom_hbond_atom_site_label_H
 _geom_hbond_atom_site_label_A
 _geom_hbond_site_symmetry_D
 _geom_hbond_site_symmetry_H
 _geom_hbond_site_symmetry_A
 _geom_hbond_distance_DH
 _geom_hbond_distance_HA
 _geom_hbond_distance_DA
 _geom_hbond_angle_DHA
 _geom_hbond_publ_flag
 ? ? ? ? ? ? ? ? ? ? ?


#=======================================================================

# 11. STRUCTURE-FACTOR LIST

loop_
 _refln_index_h
 _refln_index_k
 _refln_index_l
 _refln_F_squared_calc
 _refln_F_squared_meas
 _refln_F_squared_sigma
 _refln_observed_status
   2   0   0 1359540.  847424.  9133. o
   4   0   0  866483.  705636.  7935. o
   6   0   0  234848.  228899.  3612. o
   8   0   0   79453.   81636.  1862. o
   2   1   0   16267.   16095.   159. o
   4   1   0   64172.   64933.   561. o
   6   1   0   35427.   35971.   477. o
   8   1   0   24722.   24798.   459. o
   0   2   0  223256.  189774.  2976. o
   2   2   0   61652.   58055.   496. o
   4   2   0  100443.  101063.   861. o
   6   2   0   30504.   30665.   430. o
   8   2   0   19875.   20409.   477. o
   2   3   0    2552.    2396.    56. o
   4   3   0   23986.   23834.   262. o
   6   3   0   17775.   18631.   290. o
   8   3   0   21259.   21850.   552. o
   0   4   0  339095.  285428.  5849. o
   2   4   0  359145.  338328.  3032. o
   4   4   0  134238.  133955.  1151. o
   6   4   0   78412.   79615.   936. o
   8   4   0   20320.   20933.   543. o
   2   5   0    7457.    7860.   140. o
   4   5   0   16113.   16413.   225. o
   6   5   0   24517.   25079.   505. o
   8   5   0    9064.    8506.   430. o
   0   6   0  124239.  118609.  1956. o
   2   6   0  245593.  235561.  2807. o
   4   6   0  107583.  108998.  1188. o
   6   6   0   73747.   74356.  1348. o
   2   7   0   26116.   26538.   374. o
   4   7   0   24387.   25125.   402. o
   6   7   0   56645.   54359.  1057. o
   0   8   0   39002.   39321.   758. o
   2   8   0   38968.   39836.   505. o
   4   8   0   11756.   12287.   299. o
   6   8   0    2298.    2807.   271. o
   2   9   0    2230.    2452.   112. o
   4   9   0     228.     299.   103. o
   6   9   0     440.     440.   197. o
   0  10   0  232942.  227102.  4838. o
   2  10   0  242866.  241475.  2761. o
   4  10   0  103493.  104067.  1479. o
   6  10   0   41209.   39901.   964. o
   2  11   0   12749.   13438.   281. o
   4  11   0   29788.   29449.   590. o
   6  11   0   23310.   22393.   674. o
   0  12   0     932.    1572.   253. o
   2  12   0     492.     524.   112. o
   4  12   0    2973.    2938.   206. o
   6  12   0   11946.   11688.   543. o
   2  13   0    4812.    5165.   215. o
   4  13   0    8611.    8263.   328. o
   6  13   0   11514.   10752.   608. o
   0  14   0     424.     449.   178. o
   2  14   0     672.     692.   131. o
   4  14   0     263.     234.   140. <
   6  14   0     774.     814.   299. o
   2  15   0    9517.    9077.   365. o
   4  15   0   20407.   19595.   496. o
   6  15   0   25280.   25088.   964. o
   0  16   0    1633.    1525.   309. o
   2  16   0    4944.    4894.   374. o
   4  16   0     102.     365.   187. <
   2  17   0       3.     159.   206. <
   4  17   0      48.    -150.   197. <
   0  18   0   21551.   23797.   926. o
   2  18   0   15009.   15216.   627. o
   4  18   0   15345.   15786.   898. o
   2  19   0    2818.    2601.   402. o
   4  19   0    5204.    5165.   561. o
   0  20   0   65694.   66430.  3556. o
   2  20   0   54981.   50532.  1993. o
   2  21   0       3.      56.   374. <
   1   1   1     823.     861.    19. o
   2   1   1   15715.   15843.   103. o
   3   1   1    2580.    2480.    47. o
   4   1   1   38875.   39068.   262. o
   5   1   1    5722.    5689.    94. o
   6   1   1   25426.   25912.   281. o
   7   1   1    2186.    2171.   112. o
   8   1   1   26655.   27324.   374. o
   0   2   1  125834.  117991.  1712. o
   1   2   1   10897.   11323.    66. o
   2   2   1  104903.  106565.   590. o
   3   2   1   23255.   24274.   168. o
   4   2   1   47304.   48613.   309. o
   5   2   1   21867.   21663.   187. o
   6   2   1    9475.    9601.   159. o
   7   2   1   20316.   20016.   262. o
   8   2   1    1340.    1525.   131. o
   1   3   1    4690.    4613.    47. o
   2   3   1    5670.    5942.    66. o
   3   3   1   15701.   15955.   122. o
   4   3   1     356.     459.    37. o
   5   3   1   20056.   20119.   178. o
   6   3   1    5335.    5194.   122. o
   7   3   1   11903.   12296.   234. o
   8   3   1    1634.    1684.   159. o
   0   4   1   11725.   12895.   262. o
   1   4   1  206093.  197522.  1366. o
   2   4   1   14478.   16535.   140. o
   3   4   1  118203.  117804.   767. o
   4   4   1       4.      84.    37. o
   5   4   1   53356.   54218.   412. o
   6   4   1    1836.    1937.    94. o
   7   4   1   29615.   29205.   430. o
   8   4   1     628.     636.   131. o
   1   5   1     218.     243.    28. o
   2   5   1    9424.    9638.   103. o
   3   5   1    2973.    2994.    66. o
   4   5   1   17899.   17986.   178. o
   5   5   1    3300.    3434.   103. o
   6   5   1   18046.   18032.   290. o
   7   5   1    5535.    5689.   215. o
   8   5   1   10126.   10134.   328. o
   0   6   1  206129.  187322.  2396. o
   1   6   1   22091.   22842.   225. o
   2   6   1  257407.  250010.  1993. o
   3   6   1   14785.   15290.   150. o
   4   6   1   73516.   75404.   590. o
   5   6   1    8113.    8731.   178. o
   6   6   1   25017.   24723.   430. o
   7   6   1    3163.    3163.   197. o
   1   7   1      53.      -9.    37. <
   2   7   1   14303.   14532.   168. o
   3   7   1     169.     206.    47. o
   4   7   1   18379.   18706.   243. o
   5   7   1    1042.    1170.    94. o
   6   7   1   18850.   18116.   365. o
   7   7   1     671.     655.   150. o
   0   8   1   14980.   16095.   337. o
   1   8   1  112578.  111955.   936. o
   2   8   1   19933.   20634.   225. o
   3   8   1   75086.   76013.   730. o
   4   8   1    3860.    4117.   131. o
   5   8   1   58935.   59431.   730. o
   6   8   1    3646.    4127.   206. o
   7   8   1   33868.   33201.   627. o
   1   9   1    1919.    1694.    84. o
   2   9   1    8060.    8029.   131. o
   3   9   1    6988.    7084.   159. o
   4   9   1   21994.   22524.   318. o
   5   9   1    9731.    9882.   271. o
   6   9   1   25354.   24779.   468. o
   7   9   1    7634.    7552.   365. o
   0  10   1   84497.   85876.  1291. o
   1  10   1  369516.  346066.  3144. o
   2  10   1   36007.   37440.   374. o
   3  10   1  237403.  230489.  2124. o
   4  10   1   35029.   34633.   430. o
   5  10   1  127749.  125505.  1460. o
   6  10   1    8352.    8179.   290. o
   7  10   1   49200.   49315.   936. o
   1  11   1      89.     112.    66. <
   2  11   1     471.     421.    66. o
   3  11   1    3081.    3182.   122. o
   4  11   1    2446.    2555.   131. o
   5  11   1    2883.    3004.   168. o
   6  11   1     807.     692.   150. o
   7  11   1    3179.    2863.   271. o
   0  12   1    6625.    6607.   253. o
   1  12   1   12996.   13194.   243. o
   2  12   1    2318.    2470.   112. o
   3  12   1    9539.   10088.   225. o
   4  12   1    1831.    1993.   131. o
   5  12   1    2445.    2695.   168. o
   6  12   1     722.     758.   168. o
   1  13   1    1377.    1394.   112. o
   2  13   1    3332.    3509.   131. o
   3  13   1   10650.   10331.   234. o
   4  13   1   16171.   15618.   299. o
   5  13   1   11552.   11201.   309. o
   6  13   1   14186.   14149.   477. o
   0  14   1  116066.  117664.  1797. o
   1  14   1  175528.  177384.  2208. o
   2  14   1   85247.   85698.   983. o
   3  14   1  129282.  129108.  1413. o
   4  14   1   50657.   49203.   627. o
   5  14   1   67528.   65756.   889. o
   6  14   1   19249.   19024.   561. o
   1  15   1     479.     571.   122. o
   2  15   1      83.      84.   112. <
   3  15   1    1425.    1488.   131. o
   4  15   1      50.      66.   103. <
   5  15   1    2262.    2096.   178. o
   6  15   1     313.      47.   187. <
   0  16   1   66738.   69537.  1319. o
   1  16   1   71825.   73514.  1085. o
   2  16   1   49410.   50073.   814. o
   3  16   1   62801.   62640.   870. o
   4  16   1   25720.   25734.   440. o
   5  16   1   42649.   42241.   692. o
   1  17   1     980.     880.   187. o
   2  17   1    5144.    4744.   262. o
   3  17   1    2208.    2162.   215. o
   4  17   1   14390.   13185.   384. o
   5  17   1    5300.    5119.   281. o
   0  18   1   22089.   24452.   842. o
   1  18   1   13931.   14523.   552. o
   2  18   1   18656.   18491.   487. o
   3  18   1   12986.   12932.   440. o
   4  18   1    7320.    7814.   412. o
   1  19   1      40.      84.   225. <
   2  19   1     310.     374.   215. <
   3  19   1     282.     112.   178. <
   4  19   1     904.     533.   243. o
   0  20   1   12144.   13803.  1544. o
   1  20   1  101500.  101868.  2742. o
   2  20   1   12066.   11697.   599. o
   3  20   1   79103.   74094.  1647. o
   1  21   1     543.      66.   346. <
   2  21   1    2665.    2134.   449. o
   0   0   2   74492.   71727.   814. o
   1   0   2  110642.  109251.   973. o
   2   0   2   73577.   74506.   618. o
   3   0   2   94876.   96833.   777. o
   4   0   2   41064.   41501.   374. o
   5   0   2   51216.   51739.   561. o
   6   0   2   29194.   29046.   412. o
   7   0   2   15232.   15347.   318. o
   8   0   2   21218.   20652.   449. o
   1   1   2     288.     290.     9. o
   2   1   2      99.      84.    19. o
   3   1   2   10944.   11472.   103. o
   4   1   2    1115.    1048.    37. o
   5   1   2    8434.    8525.   112. o
   6   1   2    1092.    1067.    75. o
   7   1   2   12794.   12764.   206. o
   8   1   2    1280.    1160.   112. o
   0   2   2   16173.   17087.   168. o
   1   2   2    9767.   10181.    66. o
   2   2   2    9700.    9779.    75. o
   3   2   2    1649.    1843.    37. o
   4   2   2   14502.   14766.   131. o
   5   2   2     394.     487.    47. o
   6   2   2   10074.    9704.   168. o
   7   2   2      90.     -19.    75. <
   8   2   2    6951.    6747.   215. o
   1   3   2   10257.   10331.    75. o
   2   3   2    1400.    1394.    37. o
   3   3   2   37932.   39452.   243. o
   4   3   2    3479.    3490.    66. o
   5   3   2   43745.   44440.   328. o
   6   3   2    2043.    2049.    84. o
   7   3   2   33292.   33809.   412. o
   8   3   2    1417.    1394.   150. o
   0   4   2   10330.   10172.   187. o
   1   4   2  488596.  420189.  2817. o
   2   4   2   23726.   25004.   206. o
   3   4   2  287862.  278476.  1759. o
   4   4   2   11094.   11285.   122. o
   5   4   2   88979.   90826.   655. o
   6   4   2   10029.   10181.   178. o
   7   4   2   20588.   21700.   374. o
   8   4   2    6412.    6242.   243. o
   1   5   2    2481.    2620.    56. o
   2   5   2    1592.    1647.    47. o
   3   5   2    9303.    9638.   103. o
   4   5   2    4737.    4857.    94. o
   5   5   2    6567.    6513.   140. o
   6   5   2    5181.    5399.   178. o
   7   5   2    9009.    9292.   281. o
   8   5   2    3001.    2667.   215. o
   0   6   2  233813.  221001.  2817. o
   1   6   2  127229.  127078.   945. o
   2   6   2  213352.  206899.  1759. o
   3   6   2   64421.   64643.   468. o
   4   6   2  116933.  116887.   917. o
   5   6   2   27549.   28139.   337. o
   6   6   2   69786.   69462.   861. o
   7   6   2   10854.   11248.   346. o
   1   7   2    6333.    6345.   103. o
   2   7   2    4938.    5147.   103. o
   3   7   2   14221.   14504.   178. o
   4   7   2    7493.    7542.   150. o
   5   7   2   26666.   26557.   374. o
   6   7   2    7710.    7486.   243. o
   7   7   2   19875.   19894.   459. o
   0   8   2  180659.  174820.  2274. o
   1   8   2  111211.  111357.   908. o
   2   8   2  185372.  185161.  1497. o
   3   8   2   70044.   72241.   739. o
   4   8   2   72133.   72578.   749. o
   5   8   2   16863.   17368.   309. o
   6   8   2   36116.   36065.   590. o
   7   8   2    3027.    2994.   234. o
   1   9   2    5551.    5371.   122. o
   2   9   2     848.     852.    56. o
   3   9   2   14111.   14458.   206. o
   4   9   2    1304.    1385.    94. o
   5   9   2   17430.   16507.   309. o
   6   9   2    1729.    1722.   178. o
   7   9   2   13377.   13204.   468. o
   0  10   2   32218.   33734.   561. o
   1  10   2    7949.    8263.   150. o
   2  10   2   12605.   13222.   187. o
   3  10   2    4548.    4688.   140. o
   4  10   2   14604.   14963.   262. o
   5  10   2    5598.    6157.   215. o
   6  10   2    6775.    7046.   290. o
   7  10   2    3703.    3659.   290. o
   1  11   2    1657.    1806.    94. o
   2  11   2     723.     646.    66. o
   3  11   2   12225.   12071.   225. o
   4  11   2     681.     767.   103. o
   5  11   2   27131.   26042.   421. o
   6  11   2    2519.    2695.   206. o
   7  11   2   21066.   20662.   571. o
   0  12   2  219341.  216537.  2686. o
   1  12   2   27492.   27886.   346. o
   2  12   2  177269.  176589.  1647. o
   3  12   2   15970.   16048.   281. o
   4  12   2  124810.  122080.  1357. o
   5  12   2    7669.    7561.   262. o
   6  12   2   64055.   63417.   926. o
   1  13   2       5.     150.    84. <
   2  13   2     328.     468.    84. o
   3  13   2     382.     374.    94. o
   4  13   2    2580.    2358.   150. o
   5  13   2     422.     496.   131. o
   6  13   2    1515.    1591.   206. o
   0  14   2   45100.   46405.   786. o
   1  14   2   24914.   25537.   430. o
   2  14   2   38178.   38891.   524. o
   3  14   2    8943.    8843.   225. o
   4  14   2   26264.   26192.   430. o
   5  14   2    4712.    5390.   234. o
   6  14   2   12728.   12184.   430. o
   1  15   2     397.     122.   122. <
   2  15   2    2193.    2077.   168. o
   3  15   2   12077.   11510.   281. o
   4  15   2    8327.    8469.   262. o
   5  15   2   16084.   15169.   374. o
   6  15   2    6357.    6429.   356. o
   0  16   2   58958.   59936.  1291. o
   1  16   2   36353.   37019.   599. o
   2  16   2   45840.   45263.   758. o
   3  16   2   20066.   19558.   402. o
   4  16   2   34334.   34726.   533. o
   5  16   2    7832.    8132.   328. o
   1  17   2     345.     440.   150. o
   2  17   2       7.      66.   131. <
   3  17   2     623.     599.   150. o
   4  17   2     308.     159.   140. <
   5  17   2    2161.    2031.   206. o
   0  18   2  100640.   97956.  2218. o
   1  18   2   17846.   18350.   571. o
   2  18   2   73521.   72896.  1188. o
   3  18   2   10720.   10995.   384. o
   4  18   2   61331.   58701.  1132. o
   1  19   2    1745.    1787.   337. o
   2  19   2    1143.     852.   243. o
   3  19   2   11158.   10771.   440. o
   4  19   2    2049.    2489.   356. o
   0  20   2     433.     805.   430. <
   1  20   2   31803.   30188.  1001. o
   2  20   2      86.     -75.   281. <
   3  20   2   17084.   17424.   833. o
   1  21   2     116.     524.   337. <
   2  21   2      21.     374.   374. <
   1   1   3    1759.    1600.    28. o
   2   1   3      21.     -19.    19. <
   3   1   3    7884.    7832.    84. o
   4   1   3      71.      47.    28. <
   5   1   3   18655.   18781.   187. o
   6   1   3      24.      47.    56. <
   7   1   3   13376.   13447.   215. o
   8   1   3     201.     131.   103. <
   0   2   3   20262.   20568.   178. o
   1   2   3 1057560.  707180.  3977. o
   2   2   3    6159.    6148.    56. o
   3   2   3  569246.  497661.  2938. o
   4   2   3    4453.    4492.    75. o
   5   2   3  255003.  248699.  1591. o
   6   2   3    2752.    2770.    94. o
   7   2   3   94446.   95748.   823. o
   8   2   3    1564.    1619.   140. o
   1   3   3    5980.    5998.    56. o
   2   3   3     237.     168.    19. o
   3   3   3   21944.   21878.   150. o
   4   3   3     690.     749.    37. o
   5   3   3   46343.   47060.   346. o
   6   3   3     278.     262.    56. o
   7   3   3   29219.   30487.   384. o
   8   3   3      42.       0.   122. <
   0   4   3    2284.    2330.    66. o
   1   4   3  361742.  329260.  2171. o
   2   4   3   11231.   11781.   112. o
   3   4   3  219348.  213159.  1385. o
   4   4   3    6612.    6635.    94. o
   5   4   3  107936.  108465.   814. o
   6   4   3    6514.    6560.   150. o
   7   4   3   45813.   46601.   618. o
   8   4   3    4242.    4005.   206. o
   1   5   3    3896.    4108.    66. o
   2   5   3    4616.    4716.    75. o
   3   5   3   44975.   45918.   365. o
   4   5   3    4132.    4080.    94. o
   5   5   3   49861.   49867.   496. o
   6   5   3    5123.    5334.   178. o
   7   5   3   43067.   43158.   618. o
   8   5   3    1106.     936.   168. o
   0   6   3    9314.    9816.   197. o
   1   6   3  164967.  166352.  1188. o
   2   6   3   12991.   13887.   168. o
   3   6   3   75691.   77098.   580. o
   4   6   3    1974.    2321.    84. o
   5   6   3   34165.   34371.   430. o
   6   6   3     287.     337.   103. o
   7   6   3    8000.    8684.   309. o
   1   7   3      37.      75.    28. o
   2   7   3    1330.    1366.    66. o
   3   7   3     824.     786.    56. o
   4   7   3    3801.    3790.   122. o
   5   7   3    2820.    2461.   131. o
   6   7   3    1072.     880.   131. o
   7   7   3    1365.    1553.   187. o
   0   8   3   38664.   40668.   533. o
   1   8   3  160953.  158005.  1198. o
   2   8   3   18253.   18921.   215. o
   3   8   3  130177.  128921.  1226. o
   4   8   3   15558.   15384.   262. o
   5   8   3   67222.   64652.   758. o
   6   8   3    3871.    3837.   197. o
   7   8   3   30716.   30806.   636. o
   1   9   3    2440.    2564.    75. o
   2   9   3     182.     140.    47. o
   3   9   3   21937.   22122.   299. o
   4   9   3     284.     271.    84. o
   5   9   3   24892.   24807.   393. o
   6   9   3      59.      84.   122. <
   7   9   3   25149.   25509.   618. o
   0  10   3   49255.   51982.   711. o
   1  10   3   30323.   29935.   309. o
   2  10   3   16141.   17237.   225. o
   3  10   3    9201.    9227.   197. o
   4  10   3   23726.   23956.   374. o
   5  10   3     426.     655.   112. o
   6  10   3    7162.    7102.   281. o
   7  10   3    2476.    2583.   262. o
   1  11   3      46.      37.    56. <
   2  11   3     212.     243.    66. o
   3  11   3    4581.    4492.   159. o
   4  11   3      81.     103.    94. <
   5  11   3    5464.    5502.   206. o
   6  11   3     365.     225.   140. <
   7  11   3    3800.    3565.   346. o
   0  12   3    6139.    6335.   215. o
   1  12   3   54973.   56876.   599. o
   2  12   3      42.     197.    75. o
   3  12   3   46411.   47481.   590. o
   4  12   3    1907.    2012.   140. o
   5  12   3   16547.   16030.   337. o
   6  12   3      21.    -178.   131. <
   1  13   3    3614.    3659.   140. o
   2  13   3      26.      19.    75. <
   3  13   3   15372.   14991.   290. o
   4  13   3     294.     346.   112. o
   5  13   3   22638.   22627.   430. o
   6  13   3     420.     496.   178. o
   0  14   3    7473.    8141.   318. o
   1  14   3    6710.    7365.   197. o
   2  14   3   19582.   19501.   328. o
   3  14   3    6086.    6550.   215. o
   4  14   3    6203.    6485.   225. o
   5  14   3    9299.    9629.   309. o
   6  14   3    8380.    8534.   402. o
   1  15   3      32.      19.   103. <
   2  15   3      56.     122.   112. <
   3  15   3    1111.    1085.   122. o
   4  15   3     413.     384.   122. o
   5  15   3    1241.    1376.   168. o
   0  16   3   12184.   12333.   599. o
   1  16   3   16180.   16937.   365. o
   2  16   3   21015.   21626.   440. o
   3  16   3   11623.   11267.   299. o
   4  16   3    5215.    5465.   225. o
   5  16   3   10883.   11276.   402. o
   1  17   3    2114.    2358.   225. o
   2  17   3    1280.    1759.   187. o
   3  17   3    8247.    7935.   299. o
   4  17   3    1659.    1553.   168. o
   5  17   3   13954.   13578.   449. o
   0  18   3    8898.   10003.   655. o
   1  18   3   36729.   36168.   777. o
   2  18   3    2749.    2994.   262. o
   3  18   3   28875.   28550.   636. o
   4  18   3    2724.    3154.   271. o
   1  19   3       2.     -84.   225. <
   2  19   3      17.     281.   206. <
   3  19   3     143.       9.   178. <
   0  20   3    7262.    8338.   646. o
   1  20   3     593.      19.   262. <
   2  20   3    5573.    5212.   487. o
   3  20   3      69.     543.   299. <
   1  21   3    1274.     861.   393. o
   2  21   3      23.     -66.   290. <
   0   0   4   17896.   18753.   299. o
   1   0   4     197.     262.    28. o
   2   0   4    1204.    1497.    47. o
   3   0   4      84.     197.    37. o
   4   0   4    3095.    3135.    94. o
   5   0   4    2139.    2321.   103. o
   6   0   4   10493.    9938.   234. o
   7   0   4    4307.    4529.   197. o
   8   0   4   15190.   16301.   412. o
   1   1   4    2653.    2676.    37. o
   2   1   4    2886.    2723.    47. o
   3   1   4   18454.   18837.   150. o
   4   1   4   18796.   18912.   159. o
   5   1   4   14953.   15281.   168. o
   6   1   4   13300.   13587.   178. o
   7   1   4   13379.   13915.   225. o
   8   1   4    8052.    8441.   234. o
   0   2   4   76564.   77061.   692. o
   1   2   4   82945.   83948.   533. o
   2   2   4   34354.   34857.   225. o
   3   2   4   38198.   39153.   271. o
   4   2   4   23069.   24180.   187. o
   5   2   4   16681.   17330.   168. o
   6   2   4   10560.   10509.   168. o
   7   2   4    4470.    4510.   140. o
   8   2   4    4469.    4866.   197. o
   1   3   4    3368.    3331.    47. o
   2   3   4    2288.    2274.    37. o
   3   3   4   10786.   11051.   103. o
   4   3   4    4515.    4623.    75. o
   5   3   4   15350.   15506.   168. o
   6   3   4    6526.    6597.   140. o
   7   3   4   14098.   14018.   262. o
   8   3   4    3727.    3575.   197. o
   0   4   4    2692.    2994.    66. o
   1   4   4  130335.  130587.   880. o
   2   4   4     253.     365.    28. o
   3   4   4   71890.   73505.   515. o
   4   4   4     205.     281.    37. o
   5   4   4   20924.   21738.   215. o
   6   4   4     459.     440.    75. o
   7   4   4    2367.    2536.   159. o
   8   4   4    2179.    2003.   168. o
   1   5   4     235.     187.    28. o
   2   5   4     592.     571.    37. o
   3   5   4    4270.    4436.    84. o
   4   5   4   10549.   10415.   140. o
   5   5   4    3027.    2976.   103. o
   6   5   4    6355.    6513.   206. o
   7   5   4    3686.    3350.   187. o
   0   6   4  225707.  221487.  2349. o
   1   6   4    1419.    1553.    47. o
   2   6   4   99663.  100651.   814. o
   3   6   4    2988.    3069.    75. o
   4   6   4   92933.   92791.   805. o
   5   6   4    3397.    3752.   150. o
   6   6   4   44932.   45376.   655. o
   7   6   4    3060.    2994.   197. o
   1   7   4     994.    1048.    47. o
   2   7   4    7355.    7421.   140. o
   3   7   4    3869.    4099.   103. o
   4   7   4   11054.   11323.   197. o
   5   7   4    8806.    8834.   243. o
   6   7   4   13566.   12923.   337. o
   7   7   4    6310.    6373.   290. o
   0   8   4  230546.  226877.  2583. o
   1   8   4   90270.   91799.   702. o
   2   8   4  154944.  153756.  1348. o
   3   8   4   65133.   66430.   749. o
   4   8   4   94391.   95177.  1104. o
   5   8   4   29511.   29823.   449. o
   6   8   4   37110.   38563.   590. o
   7   8   4   10234.   11005.   384. o
   1   9   4    1833.    1937.    66. o
   2   9   4     188.     299.    56. o
   3   9   4    4963.    4903.   150. o
   4   9   4    1613.    1497.   112. o
   5   9   4    7008.    6588.   225. o
   6   9   4    1878.    1984.   178. o
   7   9   4    8427.    8319.   356. o
   0  10   4     221.     505.    84. o
   1  10   4       3.     234.    47. o
   2  10   4    1145.    1301.    84. o
   3  10   4     917.     852.    84. o
   4  10   4     788.     936.   112. o
   5  10   4     472.     505.   112. o
   6  10   4    4593.    4791.   234. o
   7  10   4    1165.    1376.   215. o
   1  11   4    3033.    3135.   103. o
   2  11   4    7283.    7561.   168. o
   3  11   4   19395.   19782.   318. o
   4  11   4   16143.   15861.   309. o
   5  11   4   29768.   28878.   477. o
   6  11   4   15521.   15590.   402. o
   7  11   4   24534.   24227.   945. o
   0  12   4  308330.  304612.  3696. o
   1  12   4  175792.  176046.  1469. o
   2  12   4  298803.  289873.  2648. o
   3  12   4  120137.  118946.  1263. o
   4  12   4  151915.  145690.  1591. o
   5  12   4   53608.   51991.   739. o
   6  12   4   75462.   74936.  1057. o
   1  13   4     275.     328.    75. o
   2  13   4    2982.    3135.   140. o
   3  13   4      77.      56.    94. <
   4  13   4    4614.    4520.   197. o
   5  13   4     447.     356.   131. o
   6  13   4    8104.    8759.   365. o
   0  14   4   40014.   41754.   702. o
   1  14   4   30966.   31404.   440. o
   2  14   4   38214.   38460.   515. o
   3  14   4   21150.   21803.   365. o
   4  14   4   29008.   28354.   459. o
   5  14   4   11165.   11454.   337. o
   6  14   4   15023.   15768.   487. o
   1  15   4     484.     524.   112. o
   2  15   4    4550.    4772.   206. o
   3  15   4    3404.    2976.   159. o
   4  15   4    7082.    7234.   243. o
   5  15   4    7874.    7842.   337. o
   0  16   4   74900.   74272.  1741. o
   1  16   4   63755.   64315.   945. o
   2  16   4   75428.   74983.  1057. o
   3  16   4   39982.   40014.   627. o
   4  16   4   45221.   45357.   664. o
   5  16   4   24124.   25013.   580. o
   1  17   4      23.     -19.   150. <
   2  17   4      38.     103.   159. <
   3  17   4    1337.    1235.   178. o
   4  17   4      30.      94.   140. <
   5  17   4    1253.    1282.   215. o
   0  18   4   89835.   93016.  2424. o
   1  18   4   65114.   65925.  1198. o
   2  18   4   91862.   90835.  1535. o
   3  18   4   46200.   44795.   917. o
   4  18   4   57257.   55762.  1282. o
   1  19   4     365.     739.   197. o
   2  19   4    2195.    2583.   290. o
   3  19   4    8332.    8534.   412. o
   0  20   4     479.     449.   318. <
   1  20   4    1714.    1095.   290. o
   2  20   4      69.     112.   225. <
   3  20   4     754.     992.   299. o
   1  21   4       4.     -28.   318. <
   1   1   5     103.     131.    19. o
   2   1   5   34352.   35325.   234. o
   3   1   5     239.     234.    28. o
   4   1   5   26615.   27100.   215. o
   5   1   5     653.     655.    56. o
   6   1   5   48214.   48370.   430. o
   7   1   5     146.      56.    75. <
   8   1   5   21998.   22795.   365. o
   0   2   5  444165.  382206.  3416. o
   1   2   5   54926.   55210.   365. o
   2   2   5  550730.  475736.  2761. o
   3   2   5   39691.   40453.   281. o
   4   2   5  201005.  196717.  1216. o
   5   2   5   27624.   27783.   262. o
   6   2   5   83473.   84182.   674. o
   7   2   5   15991.   16142.   253. o
   8   2   5   22691.   23638.   402. o
   1   3   5     862.     917.    28. o
   2   3   5    6170.    6316.    75. o
   3   3   5    1217.    1273.    37. o
   4   3   5    7463.    7598.   103. o
   5   3   5    2526.    2545.    75. o
   6   3   5    6461.    6214.   140. o
   7   3   5    1434.    1507.   112. o
   8   3   5    7788.    8431.   281. o
   0   4   5   58097.   58504.   571. o
   1   4   5   74378.   77379.   571. o
   2   4   5   59310.   59730.   430. o
   3   4   5   50954.   51458.   374. o
   4   4   5   28265.   28532.   234. o
   5   4   5   35684.   36008.   309. o
   6   4   5   20635.   20980.   290. o
   7   4   5   21373.   21710.   384. o
   1   5   5    1583.    1731.    56. o
   2   5   5    6370.    6663.    84. o
   3   5   5    4909.    5128.    94. o
   4   5   5   26646.   26763.   262. o
   5   5   5    8215.    8225.   168. o
   6   5   5   19574.   19305.   346. o
   7   5   5    4475.    4922.   215. o
   0   6   5  315505.  298473.  3350. o
   1   6   5    4187.    4342.    94. o
   2   6   5  155736.  153410.  1160. o
   3   6   5    1974.    2134.    66. o
   4   6   5  112513.  114014.   992. o
   5   6   5     534.     561.   103. o
   6   6   5   22054.   22898.   430. o
   7   6   5      45.      75.   150. <
   1   7   5      74.      47.    37. <
   2   7   5    9903.   10022.   150. o
   3   7   5    1541.    1516.    75. o
   4   7   5   13214.   13541.   225. o
   5   7   5    1272.    1404.   131. o
   6   7   5   14677.   14869.   346. o
   7   7   5    1293.    1226.   206. o
   0   8   5  245551.  245218.  2648. o
   1   8   5  143539.  142976.  1076. o
   2   8   5   95340.   97283.   917. o
   3   8   5  101078.   99182.  1039. o
   4   8   5   91040.   89731.  1020. o
   5   8   5   48683.   48417.   664. o
   6   8   5   33345.   33023.   599. o
   7   8   5   23933.   23591.   580. o
   1   9   5     218.     131.    47. o
   2   9   5    8229.    8375.   159. o
   3   9   5      29.      28.    66. <
   4   9   5   34166.   33519.   459. o
   5   9   5      97.     299.   103. o
   6   9   5   27859.   27980.   543. o
   7   9   5     115.     -47.   178. <
   0  10   5    4258.    4641.   140. o
   1  10   5  145861.  147646.  1114. o
   2  10   5    5353.    5512.   159. o
   3  10   5  109751.  108053.  1104. o
   4  10   5     603.     777.   103. o
   5  10   5   60745.   59590.   805. o
   6  10   5      64.     131.   140. <
   7  10   5   30890.   32209.   786. o
   1  11   5     310.     318.    56. o
   2  11   5    1153.    1160.    94. o
   3  11   5     184.     215.    84. o
   4  11   5     817.     833.   112. o
   5  11   5    1018.    1067.   140. o
   6  11   5    2004.    1778.   197. o
   0  12   5   14206.   14860.   328. o
   1  12   5    8443.    8712.   159. o
   2  12   5   13245.   13718.   243. o
   3  12   5    4755.    4903.   187. o
   4  12   5    4184.    3996.   178. o
   5  12   5    1650.    1872.   159. o
   6  12   5    2895.    3097.   253. o
   1  13   5     353.     346.    75. o
   2  13   5    6876.    6831.   197. o
   3  13   5     796.     739.   112. o
   4  13   5   16902.   16030.   337. o
   5  13   5    1927.    2105.   178. o
   6  13   5   24425.   24414.   561. o
   0  14   5   30565.   31620.   627. o
   1  14   5   51970.   53086.   655. o
   2  14   5   17831.   18032.   309. o
   3  14   5   41311.   41492.   599. o
   4  14   5    7255.    7187.   253. o
   5  14   5   28402.   28812.   515. o
   6  14   5     543.     468.   187. o
   1  15   5      90.      56.   103. <
   2  15   5      85.      94.   112. <
   3  15   5       5.      -9.   103. <
   4  15   5     761.     655.   140. o
   5  15   5      57.     374.   150. o
   0  16   5    6242.    6728.   515. o
   1  16   5   44816.   45609.   664. o
   2  16   5    5691.    5615.   243. o
   3  16   5   34030.   35110.   571. o
   4  16   5     573.     618.   140. o
   5  16   5   19837.   20241.   524. o
   1  17   5     288.     234.   168. <
   2  17   5    4425.    4398.   271. o
   3  17   5    3633.    3752.   262. o
   4  17   5   16244.   15440.   449. o
   0  18   5   28373.   28794.   908. o
   1  18   5   15443.   15534.   487. o
   2  18   5   17861.   17527.   533. o
   3  18   5    8806.    8880.   402. o
   4  18   5    9673.    9133.   487. o
   1  19   5      41.     281.   187. <
   2  19   5     230.     131.   206. <
   3  19   5     105.     290.   225. <
   0  20   5     137.      94.   299. <
   1  20   5   37632.   37758.  1001. o
   2  20   5      68.      84.   215. <
   1  21   5       6.     683.   299. o
   0   0   6  986185.  710558. 10350. o
   1   0   6   45861.   46171.   505. o
   2   0   6  949414.  726906.  6101. o
   3   0   6   25022.   25472.   271. o
   4   0   6  348152.  329737.  2957. o
   5   0   6   17349.   17705.   262. o
   6   0   6  174970.  173220.  1825. o
   7   0   6   11326.   11342.   299. o
   8   0   6   46361.   48557.  1132. o
   1   1   6      27.       9.    19. <
   2   1   6    5442.    5643.    66. o
   3   1   6     437.     449.    28. o
   4   1   6   18077.   18107.   168. o
   5   1   6     111.     168.    47. o
   6   1   6   17322.   17284.   215. o
   7   1   6     493.     599.    84. o
   8   1   6   11483.   11594.   421. o
   0   2   6   58246.   53891.   505. o
   1   2   6    1901.    2040.    37. o
   2   2   6  193785.  189812.  1245. o
   3   2   6    2707.    2845.    56. o
   4   2   6   37118.   38348.   290. o
   5   2   6    4298.    4538.   103. o
   6   2   6   29976.   30581.   309. o
   7   2   6    3301.    3369.   131. o
   8   2   6    6642.    6897.   309. o
   1   3   6    1397.    1422.    37. o
   2   3   6   13144.   13681.   122. o
   3   3   6    2776.    2807.    56. o
   4   3   6   19433.   20082.   178. o
   5   3   6    3826.    3996.    94. o
   6   3   6   32247.   32864.   337. o
   7   3   6    2797.    2854.   150. o
   0   4   6  406361.  378846.  3771. o
   1   4   6     376.     412.    37. o
   2   4   6  155951.  155076.  1085. o
   3   4   6     270.     328.    37. o
   4   4   6  132984.  132252.   898. o
   5   4   6    1691.    1731.    75. o
   6   4   6   37556.   38600.   440. o
   7   4   6    2771.    2620.   178. o
   1   5   6     607.     627.    37. o
   2   5   6    2486.    2592.    56. o
   3   5   6    3657.    3827.    84. o
   4   5   6   27822.   28195.   271. o
   5   5   6    2400.    2648.   112. o
   6   5   6   11666.   12006.   281. o
   7   5   6    2970.    2892.   197. o
   0   6   6  104575.  107763.  1235. o
   1   6   6   76391.   77295.   646. o
   2   6   6   93002.   95570.   721. o
   3   6   6   58421.   59159.   477. o
   4   6   6   69270.   69827.   711. o
   5   6   6   33111.   33051.   505. o
   6   6   6   33939.   32509.   543. o
   7   6   6   17072.   17780.   459. o
   1   7   6     684.     674.    56. o
   2   7   6   12520.   13129.   168. o
   3   7   6    2629.    2789.   103. o
   4   7   6   42892.   43223.   552. o
   5   7   6    4891.    4829.   206. o
   6   7   6   33122.   32902.   590. o
   7   7   6    3570.    3416.   271. o
   0   8   6   84446.   87345.  1039. o
   1   8   6   96809.   96450.   870. o
   2   8   6   68695.   70295.   646. o
   3   8   6   68236.   67806.   730. o
   4   8   6   23577.   24115.   421. o
   5   8   6   28020.   28457.   515. o
   6   8   6    4952.    5596.   262. o
   7   8   6   10390.   10780.   468. o
   1   9   6    1022.    1029.    66. o
   2   9   6     673.     702.    75. o
   3   9   6    1094.    1076.   103. o
   4   9   6     308.     365.   103. o
   5   9   6    1712.    1712.   168. o
   6   9   6    3351.    3509.   225. o
   7   9   6    1655.    1535.   243. o
   0  10   6  110495.  113939.  1282. o
   1  10   6   13774.   14823.   206. o
   2  10   6   82987.   81262.   833. o
   3  10   6   13268.   13344.   243. o
   4  10   6   57009.   54780.   730. o
   5  10   6    5083.    4913.   225. o
   6  10   6   22386.   22262.   496. o
   7  10   6    2797.    2901.   421. o
   1  11   6      10.      47.    56. <
   2  11   6    6048.    5718.   168. o
   3  11   6     154.     215.    84. o
   4  11   6    7023.    7140.   243. o
   5  11   6     716.     889.   150. o
   6  11   6   14738.   14299.   430. o
   0  12   6    1288.    1535.   122. o
   1  12   6   74888.   77641.   739. o
   2  12   6     388.     440.    84. o
   3  12   6   59501.   58822.   767. o
   4  12   6    2493.    2461.   159. o
   5  12   6   38549.   37159.   618. o
   6  12   6    2202.    2433.   234. o
   1  13   6      48.     168.    75. o
   2  13   6     684.     674.   103. o
   3  13   6      20.     140.   103. <
   4  13   6    2962.    3135.   187. o
   5  13   6      83.     197.   140. <
   6  13   6    2942.    3172.   253. o
   0  14   6    2262.    2957.   234. o
   1  14   6   31340.   32209.   505. o
   2  14   6    5851.    6578.   206. o
   3  14   6   18308.   18369.   365. o
   4  14   6     563.     178.   122. <
   5  14   6   10204.   10612.   356. o
   6  14   6       7.     243.   197. <
   1  15   6     273.     262.   122. o
   2  15   6   10289.   10284.   299. o
   3  15   6    4351.    4033.   197. o
   4  15   6   23594.   23572.   440. o
   5  15   6    6578.    6756.   309. o
   0  16   6   11487.   10705.   515. o
   1  16   6   30755.   30936.   515. o
   2  16   6    4589.    4866.   243. o
   3  16   6   19218.   19193.   421. o
   4  16   6    2612.    2377.   197. o
   5  16   6   11836.   12315.   459. o
   1  17   6       0.       9.   150. <
   2  17   6       2.     -19.   159. <
   3  17   6      33.     122.   150. <
   4  17   6       8.       9.   168. <
   0  18   6    2024.    2302.   309. o
   1  18   6   47024.   47930.   908. o
   2  18   6    4678.    4716.   328. o
   3  18   6   35546.   34979.   795. o
   4  18   6    2632.    3079.   299. o
   1  19   6      71.      28.   187. <
   2  19   6    2740.    2732.   299. o
   3  19   6    1536.    1076.   299. o
   0  20   6   55158.   56876.  1722. o
   1  20   6     665.    1067.   243. o
   2  20   6   53184.   52281.  1291. o
   1  21   6       3.     140.   243. <
   1   1   7    1596.    1600.    47. o
   2   1   7   13525.   13494.   122. o
   3   1   7    7329.    7271.    84. o
   4   1   7   14529.   14514.   150. o
   5   1   7   12789.   12717.   168. o
   6   1   7   23742.   23385.   271. o
   7   1   7    9548.    9573.   197. o
   0   2   7    9141.   10415.   140. o
   1   2   7   14126.   14813.   131. o
   2   2   7     522.     646.    37. o
   3   2   7    2229.    2368.    56. o
   4   2   7    6802.    6625.   103. o
   5   2   7      85.     122.    56. o
   6   2   7    6208.    6382.   140. o
   7   2   7    1596.    1544.   112. o
   1   3   7    2692.    2742.    56. o
   2   3   7     553.     571.    37. o
   3   3   7    8427.    8450.    94. o
   4   3   7    3652.    3612.    75. o
   5   3   7   20040.   19660.   215. o
   6   3   7    1533.    1422.    94. o
   7   3   7    9754.    9629.   253. o
   0   4   7  145086.  145784.  1357. o
   1   4   7   43269.   44571.   328. o
   2   4   7   79741.   80776.   571. o
   3   4   7   25960.   26361.   225. o
   4   4   7   65128.   66711.   515. o
   5   4   7   16894.   17424.   206. o
   6   4   7   24417.   24910.   356. o
   7   4   7   10099.   10452.   299. o
   1   5   7     545.     608.    37. o
   2   5   7      82.     112.    37. o
   3   5   7    9397.    9685.   131. o
   4   5   7     745.     767.    66. o
   5   5   7   14182.   14467.   225. o
   6   5   7     544.     599.   131. o
   7   5   7   11964.   12698.   430. o
   0   6   7  117293.  118515.  1422. o
   1   6   7  100577.  102439.   852. o
   2   6   7   49404.   51084.   421. o
   3   6   7   48277.   49830.   412. o
   4   6   7   42426.   42690.   459. o
   5   6   7   26396.   27446.   430. o
   6   6   7    9855.   10022.   346. o
   7   6   7    5244.    5100.   281. o
   1   7   7      51.      66.    47. <
   2   7   7    1791.    1703.    75. o
   3   7   7    2976.    3079.   103. o
   4   7   7    3914.    3902.   150. o
   5   7   7    5484.    5418.   234. o
   6   7   7    4508.    4464.   243. o
   7   7   7    4634.    4698.   309. o
   0   8   7     982.    1357.    94. o
   1   8   7   23138.   24695.   309. o
   2   8   7   10663.   11229.   206. o
   3   8   7   16458.   16582.   281. o
   4   8   7    4765.    4894.   206. o
   5   8   7   13093.   12736.   346. o
   6   8   7   11055.   10939.   374. o
   7   8   7   11108.   11622.   487. o
   1   9   7     792.     898.    75. o
   2   9   7    6890.    6625.   187. o
   3   9   7   14632.   13980.   262. o
   4   9   7   20744.   20316.   412. o
   5   9   7   13558.   12979.   365. o
   6   9   7   16773.   16367.   430. o
   7   9   7   16135.   15178.   561. o
   0  10   7  135365.  135453.  1675. o
   1  10   7  243647.  233718.  2077. o
   2  10   7  130243.  126151.  1357. o
   3  10   7  163137.  157481.  1628. o
   4  10   7   66978.   64250.   926. o
   5  10   7   81267.   78427.  1057. o
   6  10   7   34258.   33978.   636. o
   1  11   7     141.     253.    75. o
   2  11   7    1074.    1029.   103. o
   3  11   7    1991.    1918.   140. o
   4  11   7    1065.     898.   131. o
   5  11   7    4571.    4407.   234. o
   6  11   7    2164.    1825.   206. o
   0  12   7     402.     412.   112. o
   1  12   7   11924.   12951.   225. o
   2  12   7     114.     178.    94. <
   3  12   7   11715.   11547.   299. o
   4  12   7     170.     309.   122. o
   5  12   7    2521.    2658.   197. o
   6  12   7      23.     103.   168. <
   1  13   7    3968.    3977.   168. o
   2  13   7    3537.    3462.   159. o
   3  13   7   10350.   10350.   299. o
   4  13   7    7345.    6990.   271. o
   5  13   7   17723.   18126.   430. o
   6  13   7   11878.   11706.   440. o
   0  14   7  194353.  196016.  3303. o
   1  14   7  131700.  131812.  1516. o
   2  14   7  161760.  160503.  1815. o
   3  14   7   97884.   94812.  1216. o
   4  14   7   98146.   94391.  1235. o
   5  14   7   48047.   46405.   786. o
   1  15   7       4.      -9.   112. <
   2  15   7     473.     618.   131. o
   3  15   7    1395.    1263.   168. o
   4  15   7    1872.    1638.   187. o
   5  15   7     993.     964.   187. o
   0  16   7   79712.   80925.  1769. o
   1  16   7   62384.   64868.   917. o
   2  16   7   76744.   75966.  1151. o
   3  16   7   53452.   54237.   898. o
   4  16   7   49117.   47874.   786. o
   5  16   7   28912.   27942.   636. o
   1  17   7    1338.    1235.   178. o
   2  17   7     734.     945.   178. o
   3  17   7    6910.    6840.   346. o
   4  17   7    2807.    2723.   262. o
   0  18   7    3093.    3359.   346. o
   1  18   7   24424.   24096.   580. o
   2  18   7    2048.    2330.   262. o
   3  18   7   19215.   19099.   655. o
   4  18   7    2067.    1956.   262. o
   1  19   7      37.     -56.   178. <
   2  19   7      68.     281.   197. <
   3  19   7      27.      37.   262. <
   0  20   7   53940.   55856.  1282. o
   1  20   7   67670.   68059.  1348. o
   2  20   7   44942.   43644.  1301. o
   0   0   8   62680.   63501.   926. o
   1   0   8  560469.  482642.  4801. o
   2   0   8   36990.   37188.   393. o
   3   0   8  392808.  357146.  3378. o
   4   0   8   20821.   21092.   281. o
   5   0   8  179224.  173464.  1806. o
   6   0   8   11764.   11510.   271. o
   7   0   8   63443.   62481.   814. o
   1   1   8    2325.    2293.    56. o
   2   1   8     487.     496.    37. o
   3   1   8   22597.   22692.   178. o
   4   1   8    2470.    2564.    75. o
   5   1   8   22918.   23104.   243. o
   6   1   8     672.     702.    75. o
   7   1   8   23584.   23563.   309. o
   0   2   8    8326.    8656.   140. o
   1   2   8   17306.   18229.   159. o
   2   2   8    1000.    1132.    37. o
   3   2   8   14326.   14224.   131. o
   4   2   8     225.     402.    47. o
   5   2   8    8680.    8441.   140. o
   6   2   8    1229.    1216.    84. o
   7   2   8    7331.    7982.   206. o
   1   3   8    5223.    5203.    75. o
   2   3   8     276.     253.    37. o
   3   3   8   19736.   19988.   168. o
   4   3   8     103.     103.    37. o
   5   3   8   27930.   27680.   290. o
   6   3   8      65.      -9.    66. <
   7   3   8   26227.   26239.   430. o
   0   4   8   39732.   41305.   412. o
   1   4   8  450512.  411261.  2742. o
   2   4   8   18875.   19221.   178. o
   3   4   8  297571.  286757.  1993. o
   4   4   8   17227.   17527.   187. o
   5   4   8  126989.  126441.  1029. o
   6   4   8    8341.    8244.   215. o
   7   4   8   40325.   41174.   664. o
   1   5   8     640.     758.    47. o
   2   5   8    1009.    1085.    56. o
   3   5   8    6743.    6728.   112. o
   4   5   8     898.     926.    66. o
   5   5   8    5517.    5970.   159. o
   6   5   8    1171.    1319.   159. o
   7   5   8    7194.    6766.   346. o
   0   6   8   89065.   91790.  1207. o
   1   6   8  266440.  258085.  2049. o
   2   6   8   65369.   67244.   524. o
   3   6   8  170345.  170628.  1319. o
   4   6   8   49118.   48651.   561. o
   5   6   8   90150.   88674.  1104. o
   6   6   8   21683.   20606.   459. o
   7   6   8   44106.   44599.   861. o
   1   7   8    3758.    3846.    94. o
   2   7   8     751.     861.    66. o
   3   7   8   13772.   13672.   215. o
   4   7   8    2060.    1993.   131. o
   5   7   8   26113.   24639.   477. o
   6   7   8    1276.     964.   168. o
   7   7   8   19231.   18304.   543. o
   0   8   8   69265.   71493.  1067. o
   1   8   8   29446.   29991.   346. o
   2   8   8   34711.   34614.   430. o
   3   8   8   17488.   17358.   299. o
   4   8   8   26012.   25266.   468. o
   5   8   8    3204.    3210.   206. o
   6   8   8    6975.    7252.   318. o
   7   8   8      17.     -28.   187. <
   1   9   8    1900.    1890.    94. o
   2   9   8     158.     178.    84. o
   3   9   8    4464.    4258.   168. o
   4   9   8     344.     365.   122. o
   5   9   8    5205.    4632.   243. o
   6   9   8      19.     159.   159. <
   7   9   8    6337.    6625.   636. o
   0  10   8   12066.   12745.   309. o
   1  10   8   80925.   81496.   823. o
   2  10   8   18413.   17911.   309. o
   3  10   8   47689.   46470.   599. o
   4  10   8    5951.    5933.   253. o
   5  10   8   31140.   30282.   571. o
   6  10   8    3674.    3154.   253. o
   1  11   8    2928.    3144.   131. o
   2  11   8    1571.    1450.   122. o
   3  11   8   22671.   22421.   384. o
   4  11   8    1012.     814.   140. o
   5  11   8   37430.   35962.   618. o
   6  11   8    2058.    2227.   243. o
   0  12   8   20089.   20849.   468. o
   1  12   8    2771.    2994.   140. o
   2  12   8   22563.   22711.   384. o
   3  12   8     402.     487.   112. o
   4  12   8   17435.   16095.   384. o
   5  12   8    1326.    1413.   178. o
   6  12   8   14630.   14972.   515. o
   1  13   8     703.     627.   103. o
   2  13   8     119.     -47.   103. <
   3  13   8     434.     337.   122. o
   4  13   8      16.      47.   131. <
   5  13   8    1439.    1188.   178. o
   6  13   8     706.     758.   215. o
   0  14   8   12316.   12586.   393. o
   1  14   8     818.     926.   122. o
   2  14   8    9433.    9938.   290. o
   3  14   8     111.     187.   131. <
   4  14   8    5287.    5250.   253. o
   5  14   8       2.     103.   159. <
   1  15   8     604.     823.   140. o
   2  15   8    1050.    1188.   150. o
   3  15   8    5404.    5512.   253. o
   4  15   8    1519.    1263.   178. o
   5  15   8   12413.   13194.   449. o
   0  16   8    5970.    6391.   365. o
   1  16   8    7907.    8572.   309. o
   2  16   8    7384.    8029.   309. o
   3  16   8    2792.    2826.   225. o
   4  16   8    3561.    3883.   262. o
   1  17   8       3.     206.   140. <
   2  17   8     209.     571.   168. o
   3  17   8     658.     739.   197. o
   4  17   8     116.      19.   187. <
   0  18   8   16844.   16891.   674. o
   1  18   8     293.     150.   168. <
   2  18   8   21246.   21719.   552. o
   3  18   8    1271.    1273.   243. o
   1  19   8     475.     664.   206. o
   2  19   8       6.    -225.   206. <
   3  19   8    9963.    9302.   646. o
   0  20   8     764.    1039.   309. o
   1  20   8   39936.   37936.  1011. o
   1   1   9     489.     505.    37. o
   2   1   9    1607.    1581.    47. o
   3   1   9    3456.    3518.    75. o
   4   1   9     447.     543.    56. o
   5   1   9    7523.    7505.   140. o
   6   1   9    2304.    2274.   103. o
   7   1   9    6553.    6560.   168. o
   0   2   9   25229.   26351.   309. o
   1   2   9  310338.  294796.  2021. o
   2   2   9    8274.    8319.   103. o
   3   2   9  193895.  188623.  1216. o
   4   2   9   12420.   12614.   150. o
   5   2   9   92497.   91752.   739. o
   6   2   9   11963.   12025.   197. o
   7   2   9   34648.   36317.   515. o
   1   3   9    2068.    2134.    56. o
   2   3   9    2682.    2620.    56. o
   3   3   9    6483.    6747.    94. o
   4   3   9    3330.    3556.    84. o
   5   3   9   16244.   16095.   215. o
   6   3   9    4463.    4669.   140. o
   7   3   9   13206.   13372.   318. o
   0   4   9   58012.   57718.   608. o
   1   4   9  109541.  111095.   805. o
   2   4   9   70461.   70791.   524. o
   3   4   9   66261.   68377.   515. o
   4   4   9   45491.   45366.   412. o
   5   4   9   29517.   30478.   337. o
   6   4   9   28159.   27624.   402. o
   7   4   9    9329.    9208.   328. o
   1   5   9    5644.    5802.   103. o
   2   5   9    2735.    2817.    66. o
   3   5   9   38511.   39518.   346. o
   4   5   9   11234.   11126.   178. o
   5   5   9   48574.   47322.   561. o
   6   5   9    5408.    5456.   262. o
   7   5   9   38343.   37730.   692. o
   0   6   9   27470.   28588.   440. o
   1   6   9  114333.  117720.   898. o
   2   6   9   15667.   16376.   178. o
   3   6   9   60954.   61377.   561. o
   4   6   9   10133.    9957.   225. o
   5   6   9   20550.   20680.   440. o
   6   6   9    1508.    1656.   187. o
   7   6   9    3434.    3406.   253. o
   1   7   9     649.     664.    56. o
   2   7   9    2503.    2386.   103. o
   3   7   9    4621.    4651.   140. o
   4   7   9     894.     777.   122. o
   5   7   9    7090.    7243.   281. o
   6   7   9    3053.    3210.   234. o
   7   7   9    3784.    4145.   318. o
   0   8   9   52734.   55145.   936. o
   1   8   9   18642.   19838.   271. o
   2   8   9   81155.   80046.   852. o
   3   8   9   19496.   19979.   328. o
   4   8   9   38792.   38095.   627. o
   5   8   9   13712.   13756.   374. o
   6   8   9   27685.   27418.   590. o
   7   8   9    8457.    9086.   487. o
   1   9   9     577.     599.    84. o
   2   9   9    1323.    1329.   112. o
   3   9   9    6611.    6719.   206. o
   4   9   9    3668.    3575.   206. o
   5   9   9    9135.    9180.   337. o
   6   9   9    5033.    5231.   290. o
   0  10   9  187610.  185460.  2573. o
   1  10   9   37580.   38329.   496. o
   2  10   9  186225.  178236.  1956. o
   3  10   9   19936.   19108.   365. o
   4  10   9   98617.   92061.  1263. o
   5  10   9    6676.    6747.   299. o
   6  10   9   54510.   53947.   936. o
   1  11   9      79.     225.    84. o
   2  11   9     901.     833.   112. o
   3  11   9    2032.    1806.   150. o
   4  11   9    2555.    2339.   197. o
   5  11   9    2813.    2555.   197. o
   6  11   9    1467.    1170.   215. o
   0  12   9    4164.    4155.   215. o
   1  12   9   36326.   36617.   496. o
   2  12   9   11614.   11800.   290. o
   3  12   9   26695.   26473.   440. o
   4  12   9    1406.    1123.   159. o
   5  12   9   11785.   11547.   374. o
   6  12   9    2790.    3060.   281. o
   1  13   9    1160.    1198.   122. o
   2  13   9    1157.    1142.   140. o
   3  13   9    7931.    7608.   271. o
   4  13   9    4835.    4576.   243. o
   5  13   9   12023.   11763.   393. o
   0  14   9  123821.  126535.  2049. o
   1  14   9     257.     795.   122. o
   2  14   9   72215.   73140.   945. o
   3  14   9     124.     168.   131. <
   4  14   9   70975.   68770.  1039. o
   5  14   9     199.     393.   187. o
   1  15   9      12.      56.   122. <
   2  15   9      31.      37.   122. <
   3  15   9      27.      19.   140. <
   4  15   9     396.     524.   159. o
   5  15   9      42.     -94.   168. <
   0  16   9   69498.   69444.  1404. o
   1  16   9     265.     215.   140. <
   2  16   9   42554.   43214.   730. o
   3  16   9      14.     -19.   159. <
   4  16   9   38551.   38685.   739. o
   1  17   9    2313.    2498.   206. o
   2  17   9    1125.     861.   178. o
   3  17   9   10827.   11201.   477. o
   4  17   9    6595.    6485.   356. o
   0  18   9   12205.   13503.   636. o
   1  18   9   42389.   41997.   805. o
   2  18   9   14366.   13952.   515. o
   3  18   9   28085.   27820.   702. o
   1  19   9      48.      19.   187. <
   2  19   9       7.     -94.   234. <
   0  20   9   57338.   57363.  1750. o
   1  20   9    2247.    2854.   393. o
   0   0  10   61584.   63623.   964. o
   1   0  10   59018.   58907.   618. o
   2   0  10   18550.   18874.   253. o
   3   0  10   58458.   57700.   627. o
   4   0  10   13278.   13522.   234. o
   5   0  10   43298.   43691.   561. o
   6   0  10    2449.    2573.   159. o
   7   0  10   32896.   33809.   571. o
   1   1  10    1087.    1029.    47. o
   2   1  10     823.     889.    47. o
   3   1  10    7799.    7842.   112. o
   4   1  10    8994.    8918.   140. o
   5   1  10    8102.    8076.   159. o
   6   1  10    7289.    7177.   168. o
   7   1  10    5175.    5343.   168. o
   0   2  10     490.     636.    56. o
   1   2  10  131397.  131448.   936. o
   2   2  10      55.     168.    37. o
   3   2  10   80973.   80972.   580. o
   4   2  10     792.     861.    56. o
   5   2  10   32990.   33192.   337. o
   6   2  10    1075.    1170.    94. o
   7   2  10   13644.   14261.   271. o
   1   3  10      71.      56.    28. <
   2   3  10    7234.    7421.   103. o
   3   3  10    1536.    1553.    56. o
   4   3  10   20712.   20989.   225. o
   5   3  10    2645.    2648.   103. o
   6   3  10   18391.   18809.   290. o
   7   3  10    2588.    2358.   168. o
   0   4  10  109375.  108465.  1132. o
   1   4  10    4760.    4988.    84. o
   2   4  10   58396.   58607.   468. o
   3   4  10    1702.    1993.    66. o
   4   4  10   28717.   29215.   309. o
   5   4  10      47.     215.    75. o
   6   4  10    5999.    6045.   197. o
   7   4  10     653.     505.   150. o
   1   5  10      55.      47.    37. <
   2   5  10    2520.    2461.    75. o
   3   5  10     503.     459.    56. o
   4   5  10   10685.   10499.   197. o
   5   5  10     720.     992.   112. o
   6   5  10   10871.   10902.   337. o
   7   5  10     856.    1029.   178. o
   0   6  10    6380.    6578.   168. o
   1   6  10   66452.   67010.   561. o
   2   6  10    3043.    3556.   103. o
   3   6  10   51403.   51673.   505. o
   4   6  10    2915.    3303.   150. o
   5   6  10   36511.   36074.   636. o
   6   6  10    3429.    3397.   234. o
   7   6  10   22908.   22515.   533. o
   1   7  10      64.      66.    56. <
   2   7  10    9426.    9442.   197. o
   3   7  10     147.     253.    75. o
   4   7  10   15420.   15328.   356. o
   5   7  10     521.     618.   150. o
   6   7  10   22155.   21523.   505. o
   7   7  10     758.     786.   215. o
   0   8  10  135527.  135434.  1918. o
   1   8  10   42826.   44608.   524. o
   2   8  10  138648.  136398.  1422. o
   3   8  10   34587.   34773.   477. o
   4   8  10   53492.   52609.   805. o
   5   8  10   22651.   22112.   496. o
   6   8  10   23750.   23338.   543. o
   1   9  10      51.      66.    75. <
   2   9  10    2418.    2564.   140. o
   3   9  10    1474.    1450.   131. o
   4   9  10    7473.    6915.   281. o
   5   9  10    3080.    3172.   243. o
   6   9  10    8099.    8113.   365. o
   0  10  10     205.     215.   103. o
   1  10  10    8650.    9030.   234. o
   2  10  10    1898.    2124.   150. o
   3  10  10    8088.    7870.   253. o
   4  10  10     117.     309.   140. o
   5  10  10    9527.    9386.   365. o
   6  10  10     151.       9.   178. <
   1  11  10    2029.    2068.   131. o
   2  11  10    4858.    4473.   197. o
   3  11  10   10334.    9217.   281. o
   4  11  10    8595.    8151.   328. o
   5  11  10   16124.   15496.   440. o
   6  11  10   14921.   14186.   515. o
   0  12  10  104527.  107164.  1619. o
   1  12  10  205804.  202875.  2208. o
   2  12  10   86667.   81047.  1020. o
   3  12  10  142790.  132393.  1722. o
   4  12  10   56781.   53638.   823. o
   5  12  10   80038.   76808.  1095. o
   6  12  10   25207.   25294.   861. o
   1  13  10      15.     -28.    94. <
   2  13  10      54.      84.   112. <
   3  13  10     278.     318.   140. o
   4  13  10     783.     580.   168. o
   5  13  10     154.     243.   168. <
   0  14  10   37513.   38937.   805. o
   1  14  10   27044.   28260.   487. o
   2  14  10   28552.   29271.   496. o
   3  14  10   20814.   20128.   449. o
   4  14  10   18917.   19015.   487. o
   5  14  10   14643.   14785.   487. o
   1  15  10      74.     243.   131. <
   2  15  10    6227.    6242.   253. o
   3  15  10     927.    1039.   178. o
   4  15  10   17352.   16984.   487. o
   0  16  10   59567.   59590.  1263. o
   1  16  10   55365.   56689.   917. o
   2  16  10   49195.   50045.   795. o
   3  16  10   44337.   43204.   795. o
   4  16  10   29723.   28644.   618. o
   1  17  10     316.     459.   159. o
   2  17  10     162.     290.   168. <
   3  17  10     406.     599.   215. o
   0  18  10   49092.   50064.  1132. o
   1  18  10   74228.   74890.  1216. o
   2  18  10   35015.   35148.   739. o
   3  18  10   62413.   62154.  1198. o
   1  19  10     687.     945.   243. o
   2  19  10    4526.    4136.   393. o
   1   1  11     132.     140.    37. o
   2   1  11   12094.   12343.   131. o
   3   1  11    2510.    2573.    75. o
   4   1  11   36716.   36523.   337. o
   5   1  11    3156.    2966.   103. o
   6   1  11   26493.   26613.   318. o
   7   1  11    3174.    3107.   150. o
   0   2  11  597492.  535251.  4960. o
   1   2  11    8458.    8572.   112. o
   2   2  11  475628.  439784.  2854. o
   3   2  11    5406.    5718.   103. o
   4   2  11  270535.  260584.  1825. o
   5   2  11    3677.    3743.   122. o
   6   2  11  104689.  103767.   992. o
   7   2  11    2304.    2293.   140. o
   1   3  11      51.     -47.    37. <
   2   3  11   12074.   12100.   140. o
   3   3  11    1257.    1216.    66. o
   4   3  11   10575.   10752.   159. o
   5   3  11     269.     309.    75. o
   6   3  11   18958.   18762.   309. o
   7   3  11     908.     880.   140. o
   0   4  11  129258.  129015.  1376. o
   1   4  11    4505.    4370.    84. o
   2   4  11   60481.   61433.   477. o
   3   4  11    3613.    3827.    94. o
   4   4  11   77613.   77182.   711. o
   5   4  11    2067.    2527.   122. o
   6   4  11   39034.   39143.   561. o
   7   4  11    1010.     973.   168. o
   1   5  11      12.      28.    37. <
   2   5  11    2853.    2966.    84. o
   3   5  11      28.      -9.    56. <
   4   5  11    7616.    7524.   187. o
   5   5  11       8.     -28.    94. <
   6   5  11   13486.   13681.   374. o
   7   5  11      92.     299.   168. <
   0   6  11   87064.   89881.  1151. o
   1   6  11   15253.   16367.   206. o
   2   6  11  117195.  120405.  1123. o
   3   6  11    6401.    6915.   178. o
   4   6  11   47683.   46545.   664. o
   5   6  11    3646.    3678.   225. o
   6   6  11   24878.   23900.   571. o
   7   6  11     738.     917.   206. o
   1   7  11      11.     -75.    66. <
   2   7  11    1217.    1067.    94. o
   3   7  11    1068.     964.   112. o
   4   7  11    2237.    2527.   187. o
   5   7  11    1107.    1319.   178. o
   6   7  11    3827.    3500.   253. o
   0   8  11  220012.  215882.  3256. o
   1   8  11   18376.   19764.   346. o
   2   8  11  211659.  202201.  2171. o
   3   8  11   14941.   14439.   328. o
   4   8  11  103813.   97142.  1319. o
   5   8  11    7852.    7467.   328. o
   6   8  11   58738.   58589.   992. o
   1   9  11      16.     122.    84. <
   2   9  11   11513.   11529.   271. o
   3   9  11     986.     973.   131. o
   4   9  11   28730.   27240.   533. o
   5   9  11     599.     421.   168. o
   6   9  11   32952.   32359.   721. o
   0  10  11    1697.    2059.   168. o
   1  10  11    8997.    9339.   243. o
   2  10  11     816.     795.   131. o
   3  10  11    6888.    6625.   253. o
   4  10  11     294.     318.   150. o
   5  10  11    3810.    3837.   271. o
   6  10  11    5735.    5774.   346. o
   1  11  11      44.     -28.    84. <
   2  11  11     313.     459.   131. o
   3  11  11      87.     -37.   131. <
   4  11  11    1894.    1310.   178. o
   5  11  11      25.     122.   168. <
   6  11  11     591.     533.   271. <
   0  12  11   20022.   21897.   496. o
   1  12  11    3097.    3331.   168. o
   2  12  11   11166.   10565.   318. o
   3  12  11     956.     889.   159. o
   4  12  11    7116.    7009.   318. o
   5  12  11     985.    1039.   215. o
   1  13  11     196.     103.   103. <
   2  13  11    5691.    5128.   234. o
   3  13  11       5.    -112.   131. <
   4  13  11   20982.   19427.   533. o
   5  13  11      31.      19.   187. <
   0  14  11    4027.    4276.   281. o
   1  14  11      35.     197.   122. <
   2  14  11    1257.    1563.   168. o
   3  14  11      39.    -168.   131. <
   4  14  11      83.     365.   168. o
   5  14  11      96.     150.   197. <
   1  15  11      50.      84.   122. <
   2  15  11    1253.    1282.   159. o
   3  15  11       1.    -122.   140. <
   4  15  11    1599.    1357.   206. o
   0  16  11    2836.    3163.   299. o
   1  16  11     315.     814.   168. o
   2  16  11    3291.    3322.   225. o
   3  16  11     297.     206.   168. <
   4  16  11    3188.    3313.   262. o
   1  17  11      26.     206.   150. <
   2  17  11    1960.    2274.   225. o
   3  17  11      22.     103.   197. <
   0  18  11   10140.   10481.   552. o
   1  18  11     458.     814.   197. o
   2  18  11    9969.    9872.   421. o
   1  19  11      79.     262.   243. <
   0   0  12  226618.  221843.  3097. o
   1   0  12    1495.    1778.    94. o
   2   0  12   89842.   91284.   992. o
   3   0  12    4566.    4707.   150. o
   4   0  12   89350.   90180.  1039. o
   5   0  12   10897.   11080.   271. o
   6   0  12   20093.   21195.   393. o
   7   0  12   18652.   18388.   430. o
   1   1  12    1196.    1207.    56. o
   2   1  12    1521.    1572.    66. o
   3   1  12   10252.   10172.   159. o
   4   1  12    5806.    5839.   131. o
   5   1  12    8273.    8263.   168. o
   6   1  12    5826.    5755.   168. o
   7   1  12    7291.    7467.   225. o
   0   2  12   53748.   55257.   590. o
   1   2  12   22855.   23432.   215. o
   2   2  12   10947.   11370.   140. o
   3   2  12   16250.   16675.   187. o
   4   2  12   17517.   17742.   215. o
   5   2  12    8484.    8338.   168. o
   6   2  12    1687.    1684.   112. o
   7   2  12    4383.    4482.   187. o
   1   3  12     216.     234.    37. o
   2   3  12    3606.    3883.    94. o
   3   3  12    1241.    1404.    66. o
   4   3  12   14783.   14823.   197. o
   5   3  12    2007.    1956.   103. o
   6   3  12   10226.   10134.   243. o
   7   3  12    2741.    2573.   178. o
   0   4  12   44361.   46021.   543. o
   1   4  12    1456.    1666.    66. o
   2   4  12   63457.   64512.   515. o
   3   4  12     563.     590.    66. o
   4   4  12   18489.   18519.   271. o
   5   4  12    1934.    1843.   122. o
   6   4  12   10162.   10209.   299. o
   7   4  12    2612.    3032.   215. o
   1   5  12    1015.     973.    56. o
   2   5  12    4586.    4651.   112. o
   3   5  12    3982.    3996.   122. o
   4   5  12    5126.    4885.   159. o
   5   5  12    4452.    4454.   206. o
   6   5  12   12447.   12436.   365. o
   0   6  12    1141.    1338.   122. o
   1   6  12  114889.  114229.  1151. o
   2   6  12    5222.    5521.   159. o
   3   6  12   90306.   89796.   936. o
   4   6  12    1029.    1282.   140. o
   5   6  12   56351.   54490.   880. o
   6   6  12    1613.    1507.   197. o
   1   7  12    1378.    1404.   103. o
   2   7  12    9663.    9208.   215. o
   3   7  12    3079.    3060.   168. o
   4   7  12   13583.   12614.   384. o
   5   7  12    8404.    7701.   328. o
   6   7  12   26031.   25762.   580. o
   0   8  12   89370.   90938.  1497. o
   1   8  12  119203.  118525.  1460. o
   2   8  12   71904.   70342.   852. o
   3   8  12   94490.   88468.  1104. o
   4   8  12   33572.   32003.   627. o
   5   8  12   47878.   46358.   833. o
   6   8  12    9963.    9769.   402. o
   1   9  12      97.     103.    94. <
   2   9  12     159.     122.   112. <
   3   9  12     123.      66.   122. <
   4   9  12    2432.    2208.   215. o
   5   9  12     260.     421.   168. o
   6   9  12     470.     487.   206. o
   0  10  12    9482.    9882.   356. o
   1  10  12    1269.    1497.   131. o
   2  10  12   13528.   13241.   365. o
   3  10  12    3928.    3809.   215. o
   4  10  12    5895.    5222.   290. o
   5  10  12    4363.    4145.   281. o
   6  10  12    3736.    3444.   328. o
   1  11  12     735.     777.   122. o
   2  11  12    1023.    1160.   159. o
   3  11  12    6652.    5820.   271. o
   4  11  12    5127.    4810.   290. o
   5  11  12   10620.    9311.   430. o
   0  12  12   19233.   20156.   477. o
   1  12  12  211591.  209435.  2377. o
   2  12  12   10065.   10190.   318. o
   3  12  12  149968.  141376.  2049. o
   4  12  12    8492.    8282.   374. o
   5  12  12   83439.   77369.  1319. o
   1  13  12     976.    1123.   150. o
   2  13  12     585.     515.   140. o
   3  13  12    2828.    2648.   206. o
   4  13  12     973.     627.   178. o
   5  13  12    4610.    3687.   299. o
   0  14  12   15076.   15983.   496. o
   1  14  12   34590.   34530.   590. o
   2  14  12    6077.    6625.   271. o
   3  14  12   23581.   23244.   524. o
   4  14  12    6166.    6185.   328. o
   1  15  12     283.     140.   131. <
   2  15  12    4895.    5165.   253. o
   3  15  12    5209.    4922.   281. o
   4  15  12   12682.   11866.   440. o
   0  16  12   11104.   11388.   571. o
   1  16  12   54337.   54321.   861. o
   2  16  12   14086.   14589.   430. o
   3  16  12   38379.   37375.   721. o
   1  17  12       1.     112.   150. <
   2  17  12       2.    -131.   168. <
   3  17  12       2.     561.   225. o
   0  18  12    4775.    4988.   477. o
   1  18  12   75568.   75161.  1245. o
   2  18  12    5572.    5287.   384. o
   1   1  13    1115.    1188.    66. o
   2   1  13     620.     692.    56. o
   3   1  13    7248.    7102.   131. o
   4   1  13    5484.    5231.   131. o
   5   1  13   14830.   14729.   225. o
   6   1  13    2405.    2274.   131. o
   7   1  13   10980.   10125.   505. o
   0   2  13   55427.   56436.   608. o
   1   2  13   99072.   99210.   777. o
   2   2  13   67494.   67516.   524. o
   3   2  13   58459.   58514.   468. o
   4   2  13   37594.   37674.   374. o
   5   2  13   27077.   27830.   356. o
   6   2  13   26274.   25977.   374. o
   1   3  13     673.     730.    56. o
   2   3  13     385.     337.    56. o
   3   3  13    2346.    2592.    94. o
   4   3  13     565.     636.    75. o
   5   3  13    7073.    7336.   197. o
   6   3  13     136.     309.   103. o
   0   4  13   76077.   78174.   861. o
   1   4  13    7035.    7346.   122. o
   2   4  13   84908.   85211.   674. o
   3   4  13    3241.    3397.   122. o
   4   4  13   51323.   51093.   571. o
   5   4  13    1278.    1216.   112. o
   6   4  13   39566.   39199.   692. o
   1   5  13    1745.    1815.    75. o
   2   5  13     230.     243.    66. o
   3   5  13   19099.   19090.   262. o
   4   5  13      61.     178.    94. <
   5   5  13   22844.   23114.   459. o
   6   5  13     176.     328.   150. o
   0   6  13   25360.   25537.   459. o
   1   6  13  127031.  125608.  1226. o
   2   6  13   32156.   32162.   440. o
   3   6  13   74263.   74590.   880. o
   4   6  13    7894.    7608.   299. o
   5   6  13   26988.   27718.   571. o
   6   6  13    4183.    4389.   271. o
   1   7  13    1282.    1329.   103. o
   2   7  13    1731.    1553.   122. o
   3   7  13    6730.    6747.   262. o
   4   7  13    4822.    4585.   271. o
   5   7  13   13828.   13475.   430. o
   6   7  13    4720.    4595.   309. o
   0   8  13   52693.   53947.   983. o
   1   8  13    3504.    4061.   187. o
   2   8  13   29862.   29589.   515. o
   3   8  13    4666.    4557.   225. o
   4   8  13   32119.   30646.   627. o
   5   8  13    1859.    2087.   225. o
   6   8  13   17473.   17022.   543. o
   1   9  13    1431.    1441.   131. o
   2   9  13    1271.    1348.   159. o
   3   9  13    8060.    7112.   299. o
   4   9  13    1655.    1450.   206. o
   5   9  13   13600.   11585.   440. o
   6   9  13    3693.    3846.   365. o
   0  10  13   78054.   78726.  1366. o
   1  10  13   56447.   57147.   777. o
   2  10  13   60359.   57887.   880. o
   3  10  13   34921.   32181.   702. o
   4  10  13   48347.   41745.   852. o
   5  10  13   18004.   16292.   552. o
   1  11  13      25.     215.   122. <
   2  11  13      38.      37.   131. <
   3  11  13    2327.    1853.   215. o
   4  11  13     559.     487.   206. o
   5  11  13    2299.    2031.   271. o
   0  12  13    3080.    3247.   243. o
   1  12  13    9837.   10415.   318. o
   2  12  13    2808.    3135.   215. o
   3  12  13    8420.    7917.   356. o
   4  12  13    1010.     702.   215. o
   5  12  13    3270.    2948.   290. o
   1  13  13     971.    1291.   150. o
   2  13  13     277.     281.   140. <
   3  13  13    9104.    8909.   356. o
   4  13  13    1201.     664.   197. o
   0  14  13  105181.  105218.  1956. o
   1  14  13   34998.   34942.   580. o
   2  14  13   92268.   93137.  1235. o
   3  14  13   26010.   25341.   561. o
   4  14  13   65664.   63866.  1142. o
   1  15  13      14.     150.   131. <
   2  15  13       5.      19.   140. <
   3  15  13      27.      28.   168. <
   4  15  13      10.    -168.   187. <
   0  16  13   83955.   81740.  1825. o
   1  16  13   23483.   24124.   505. o
   2  16  13   69928.   69706.  1095. o
   3  16  13   16104.   16039.   533. o
   1  17  13    2422.    2555.   262. o
   2  17  13     724.     636.   215. o
   0  18  13     761.    1076.   328. o
   1  18  13   27795.   28036.   739. o
   0   0  14    2047.    2265.   168. o
   1   0  14  420034.  395222.  4080. o
   2   0  14    6694.    6840.   187. o
   3   0  14  299863.  282237.  2957. o
   4   0  14    1223.    1160.   112. o
   5   0  14  162425.  159081.  2012. o
   6   0  14     333.     421.   140. o
   1   1  14    1067.    1216.    66. o
   2   1  14     111.      75.    47. <
   3   1  14   10936.   10977.   168. o
   4   1  14     258.     337.    75. o
   5   1  14   14180.   14046.   225. o
   6   1  14     194.      66.    94. <
   0   2  14    4834.    5259.   150. o
   1   2  14   21805.   21981.   225. o
   2   2  14    3885.    4080.    94. o
   3   2  14   16696.   16937.   206. o
   4   2  14    2770.    2714.   103. o
   5   2  14   11908.   11688.   215. o
   6   2  14    2161.    1965.   150. o
   1   3  14    1850.    1928.    75. o
   2   3  14    1717.    1853.    84. o
   3   3  14   12308.   12174.   197. o
   4   3  14    4097.    4155.   150. o
   5   3  14   18993.   19333.   309. o
   6   3  14    4431.    4407.   187. o
   0   4  14   27890.   28438.   384. o
   1   4  14  251046.  246809.  1881. o
   2   4  14   21850.   22636.   271. o
   3   4  14  176318.  172827.  1628. o
   4   4  14    7979.    8263.   234. o
   5   4  14   86447.   84987.  1067. o
   6   4  14    2972.    3200.   197. o
   1   5  14     443.     552.    66. o
   2   5  14      20.      37.    66. <
   3   5  14    3881.    4276.   159. o
   4   5  14     362.     664.   122. o
   5   5  14    4499.    4660.   243. o
   6   5  14      62.       9.   150. <
   0   6  14     262.     468.   112. o
   1   6  14  170329.  169823.  1563. o
   2   6  14    3909.    4043.   159. o
   3   6  14  125096.  122951.  1553. o
   4   6  14     179.     515.   150. o
   5   6  14   74695.   72719.  1114. o
   6   6  14     134.    -112.   159. <
   1   7  14    2096.    2105.   131. o
   2   7  14     419.     384.   122. o
   3   7  14    9977.    9442.   346. o
   4   7  14     259.     337.   159. o
   5   7  14   17772.   18154.   505. o
   6   7  14     765.     646.   215. o
   0   8  14    6837.    7467.   328. o
   1   8  14   10732.   10649.   281. o
   2   8  14    2942.    3200.   197. o
   3   8  14    5716.    6045.   299. o
   4   8  14    2297.    2386.   225. o
   5   8  14     588.     487.   187. o
   6   8  14     379.     -37.   262. <
   1   9  14     480.     449.   112. o
   2   9  14     875.     664.   150. o
   3   9  14    2013.    1535.   197. o
   4   9  14    3796.    3135.   271. o
   5   9  14    3212.    2517.   271. o
   0  10  14    1314.    1628.   215. o
   1  10  14   65082.   64212.   926. o
   2  10  14    1602.    1974.   178. o
   3  10  14   48030.   40800.   767. o
   4  10  14      62.       9.   187. <
   5  10  14   27054.   26538.   749. o
   1  11  14    2072.    2040.   168. o
   2  11  14     352.     580.   159. o
   3  11  14   10650.    9311.   384. o
   4  11  14    1373.     823.   225. o
   5  11  14   21514.   18669.   636. o
   0  12  14    4403.    4716.   318. o
   1  12  14     220.     309.   122. o
   2  12  14    6796.    6466.   290. o
   3  12  14    1457.    1291.   206. o
   4  12  14    3339.    3144.   309. o
   5  12  14    3861.    3996.   496. o
   1  13  14      65.     234.   122. <
   2  13  14     307.     524.   150. o
   3  13  14     561.     374.   168. o
   4  13  14    1659.    1329.   234. o
   0  14  14    4549.    5081.   346. o
   1  14  14     109.     103.   131. <
   2  14  14    3284.    3799.   243. o
   3  14  14      24.      37.   168. <
   4  14  14    2064.    1638.   243. o
   1  15  14     324.     243.   140. <
   2  15  14     425.     571.   178. o
   3  15  14    5167.    5381.   328. o
   0  16  14    5115.    5315.   402. o
   1  16  14    2349.    2433.   215. o
   2  16  14    7023.    7318.   337. o
   3  16  14     951.     561.   477. <
   1  17  14     140.     122.   187. <
   2  17  14     121.     197.   225. <
   1   1  15     485.     515.    56. o
   2   1  15    1426.    1516.    75. o
   3   1  15    1606.    1581.    84. o
   4   1  15    3183.    3294.   122. o
   5   1  15    3086.    3228.   131. o
   6   1  15    3062.    3097.   159. o
   0   2  15     663.     833.    84. o
   1   2  15   30512.   31002.   290. o
   2   2  15      91.     187.    56. o
   3   2  15   18035.   18341.   234. o
   4   2  15    2183.    2143.   112. o
   5   2  15    5244.    5446.   178. o
   6   2  15    5564.    5325.   206. o
   1   3  15    1118.    1254.    75. o
   2   3  15    6333.    6438.   150. o
   3   3  15    6766.    6953.   178. o
   4   3  15    7831.    7430.   197. o
   5   3  15   10121.   10097.   253. o
   6   3  15   13763.   13859.   346. o
   0   4  15   42664.   43747.   636. o
   1   4  15    1072.    1160.    84. o
   2   4  15   51183.   52178.   552. o
   3   4  15     668.     618.   103. o
   4   4  15   30802.   30871.   459. o
   5   4  15     502.     496.   131. o
   6   4  15   20177.   20128.   459. o
   1   5  15     694.     692.    75. o
   2   5  15    2604.    2508.   112. o
   3   5  15    5603.    5549.   215. o
   4   5  15    5624.    5652.   225. o
   5   5  15    8899.    9040.   337. o
   6   5  15    8352.    8029.   337. o
   0   6  15   21064.   21626.   468. o
   1   6  15   16410.   17228.   271. o
   2   6  15   21812.   22561.   384. o
   3   6  15   11731.   12118.   374. o
   4   6  15   11040.   11267.   412. o
   5   6  15    5520.    5643.   299. o
   6   6  15    4401.    4744.   309. o
   1   7  15      91.     140.   103. <
   2   7  15     323.     206.   140. <
   3   7  15     127.     -28.   150. <
   4   7  15    1021.    1310.   206. o
   5   7  15     428.     290.   178. <
   0   8  15   37924.   35915.   823. o
   1   8  15     613.     758.   131. o
   2   8  15   33527.   32462.   590. o
   3   8  15     994.     758.   197. o
   4   8  15   32121.   31161.   711. o
   5   8  15     718.     702.   225. o
   1   9  15     454.     561.   122. o
   2   9  15    2400.    2433.   197. o
   3   9  15    3821.    2433.   243. o
   4   9  15   10653.   10462.   459. o
   5   9  15    5729.    4660.   356. o
   0  10  15  244368.  237526.  3949. o
   1  10  15   66005.   66122.   954. o
   2  10  15  166807.  157958.  2012. o
   3  10  15   46851.   42222.   917. o
   4  10  15  127302.  112133.  1918. o
   5  10  15   21335.   19660.   664. o
   1  11  15     219.     234.   131. <
   2  11  15    1490.    1656.   197. o
   3  11  15     908.     674.   206. o
   4  11  15    2679.    1843.   271. o
   5  11  15    1546.     926.   449. o
   0  12  15   18223.   17068.   571. o
   1  12  15   15429.   15103.   384. o
   2  12  15    6249.    6504.   318. o
   3  12  15   10131.   10237.   449. o
   4  12  15    7370.    6494.   402. o
   1  13  15     598.     590.   140. o
   2  13  15    2874.    3125.   243. o
   3  13  15    4518.    4361.   309. o
   4  13  15    9535.    8628.   430. o
   0  14  15   97385.   94634.  1825. o
   1  14  15   22406.   23610.   496. o
   2  14  15  104048.  107904.  1553. o
   3  14  15   15063.   15450.   533. o
   1  15  15      18.     -47.   150. <
   2  15  15     606.     805.   187. o
   3  15  15     478.     384.   215. <
   0  16  15   39125.   40116.  1226. o
   1  16  15    6087.    6681.   318. o
   2  16  15   49098.   48688.   964. o
   0   0  16  154628.  151220.  2246. o
   1   0  16  120290.  120059.  1338. o
   2   0  16  119451.  119713.  1329. o
   3   0  16   90622.   89132.  1095. o
   4   0  16   71055.   69612.   973. o
   5   0  16   55216.   56539.   833. o
   6   0  16   29724.   31461.   730. o
   1   1  16       8.      75.    56. <
   2   1  16    2891.    2985.   103. o
   3   1  16      97.     103.    66. <
   4   1  16    9292.    9386.   187. o
   5   1  16      17.      47.    84. <
   6   1  16   10616.   11033.   271. o
   0   2  16    3613.    3837.   140. o
   1   2  16   38334.   39396.   356. o
   2   2  16    5222.    5783.   131. o
   3   2  16   28530.   28634.   328. o
   4   2  16    2419.    2517.   122. o
   5   2  16   19088.   19221.   337. o
   6   2  16    1450.    1666.   159. o
   1   3  16      59.     168.    66. o
   2   3  16    5412.    5764.   150. o
   3   3  16     590.     646.    94. o
   4   3  16   12674.   12736.   271. o
   5   3  16     798.     571.   122. o
   6   3  16   17205.   17527.   412. o
   0   4  16  142154.  139542.  1703. o
   1   4  16     664.     795.    84. o
   2   4  16  111139.  108615.  1085. o
   3   4  16    1798.    1778.   140. o
   4   4  16   61124.   59627.   749. o
   5   4  16    2039.    1918.   187. o
   6   4  16   23982.   24152.   543. o
   1   5  16      13.     103.    66. <
   2   5  16    1459.    1394.   103. o
   3   5  16      21.      56.   112. <
   4   5  16    6952.    6766.   299. o
   5   5  16      95.     150.   159. <
   0   6  16   26944.   26997.   552. o
   1   6  16   45271.   46059.   571. o
   2   6  16   34022.   33734.   505. o
   3   6  16   36860.   35906.   711. o
   4   6  16   16856.   15833.   477. o
   5   6  16   26642.   25182.   636. o
   1   7  16      65.     150.   112. <
   2   7  16    4564.    4239.   253. o
   3   7  16      26.    -112.   159. <
   4   7  16   12329.   11669.   459. o
   5   7  16     108.     103.   197. <
   0   8  16   50200.   51748.  1245. o
   1   8  16   14939.   15188.   374. o
   2   8  16   33896.   33613.   618. o
   3   8  16   10575.   10424.   430. o
   4   8  16   19349.   18744.   590. o
   5   8  16    7978.    7449.   421. o
   1   9  16     115.     299.   140. o
   2   9  16    1300.    1460.   187. o
   3   9  16    1882.    2003.   243. o
   4   9  16    3769.    3116.   299. o
   5   9  16    2974.    2087.   290. o
   0  10  16   18654.   18472.   655. o
   1  10  16   25692.   26473.   543. o
   2  10  16   12458.   12745.   402. o
   3  10  16   17622.   16675.   543. o
   4  10  16   11212.    9985.   477. o
   1  11  16     106.     187.   140. <
   2  11  16    4732.    4688.   271. o
   3  11  16     343.     711.   206. o
   4  11  16   12527.    9732.   477. o
   0  12  16   11320.   12043.   524. o
   1  12  16   56151.   56914.   870. o
   2  12  16   13954.   14804.   449. o
   3  12  16   48782.   46826.  1001. o
   4  12  16    3779.    4211.   356. o
   1  13  16     156.     402.   140. o
   2  13  16     212.      84.   168. <
   3  13  16     629.     664.   215. o
   0  14  16    6048.    6354.   449. o
   1  14  16   15044.   15946.   468. o
   2  14  16    5535.    6157.   337. o
   3  14  16   13186.   14411.   571. o
   1  15  16     201.     178.   159. <
   2  15  16    4259.    4679.   328. o
   0  16  16   16130.   15337.   664. o
   1  16  16   22181.   22964.   561. o
   1   1  17     673.     618.    75. o
   2   1  17    5561.    5689.   140. o
   3   1  17    2442.    2246.   103. o
   4   1  17    8610.    8441.   197. o
   5   1  17    6466.    6335.   197. o
   0   2  17  213878.  208882.  2386. o
   1   2  17     323.     365.    66. o
   2   2  17  205473.  205607.  1628. o
   3   2  17     826.     880.    94. o
   4   2  17  114861.  112732.  1216. o
   5   2  17     991.     926.   122. o
   1   3  17      43.      75.    75. <
   2   3  17    1124.    1216.   103. o
   3   3  17      88.      66.    94. <
   4   3  17    5891.    5849.   197. o
   5   3  17      60.     150.   122. <
   0   4  17   62082.   62107.   973. o
   1   4  17   10478.   10462.   243. o
   2   4  17   72752.   73823.   823. o
   3   4  17    9038.    9133.   253. o
   4   4  17   38998.   38881.   580. o
   5   4  17    6645.    6064.   281. o
   1   5  17      23.     122.    84. <
   2   5  17    3920.    4052.   168. o
   3   5  17    1662.    1694.   150. o
   4   5  17   13185.   13213.   402. o
   5   5  17    1310.    1039.   197. o
   0   6  17   90414.   89095.  1488. o
   1   6  17   32873.   33585.   533. o
   2   6  17   51132.   49605.   739. o
   3   6  17   18587.   18772.   487. o
   4   6  17   39120.   40388.   795. o
   5   6  17    7982.    7889.   346. o
   1   7  17     407.     318.   150. o
   2   7  17    1602.    1656.   197. o
   3   7  17    2620.    2667.   253. o
   4   7  17    4055.    3949.   299. o
   5   7  17    5659.    5165.   328. o
   0   8  17   90212.   91022.  1956. o
   1   8  17    2155.    1965.   197. o
   2   8  17   56813.   56221.   898. o
   3   8  17    1204.    1254.   215. o
   4   8  17   54402.   52403.  1011. o
   5   8  17    1276.    1067.   365. o
   1   9  17     262.     459.   159. o
   2   9  17    3097.    3097.   234. o
   3   9  17    1572.    1254.   234. o
   4   9  17   10394.    9339.   440. o
   0  10  17     175.     889.   243. o
   1  10  17   17096.   16975.   449. o
   2  10  17      57.     459.   159. o
   3  10  17   12796.   12418.   496. o
   4  10  17    1000.    1376.   271. o
   1  11  17      75.     206.   150. <
   2  11  17     257.     318.   178. <
   3  11  17     120.    -103.   197. <
   4  11  17     223.     262.   281. <
   0  12  17    7548.    7917.   440. o
   1  12  17     219.     524.   159. o
   2  12  17    8633.    9133.   412. o
   3  12  17      37.     328.   215. <
   1  13  17     185.     421.   168. o
   2  13  17    3080.    2929.   262. o
   3  13  17    1042.    1198.   271. o
   0  14  17       0.    -131.   225. <
   1  14  17   36519.   35821.   721. o
   2  14  17     153.     253.   178. <
   1  15  17       1.      94.   168. <
   0   0  18     193.     702.   159. o
   1   0  18    4985.    5381.   197. o
   2   0  18    6428.    7524.   253. o
   3   0  18    1851.    1853.   150. o
   4   0  18     257.     281.   112. o
   5   0  18     189.      84.   122. <
   1   1  18     584.     505.    75. o
   2   1  18    1977.    2003.   103. o
   3   1  18    4849.    4866.   140. o
   4   1  18    2758.    2573.   140. o
   5   1  18    5572.    5568.   206. o
   0   2  18    5119.    5240.   187. o
   1   2  18    3198.    3303.   112. o
   2   2  18     233.     449.    84. o
   3   2  18    2451.    2583.   140. o
   4   2  18    2845.    2845.   150. o
   5   2  18    2557.    2676.   168. o
   1   3  18     671.     721.    94. o
   2   3  18     550.     580.   103. o
   3   3  18    2693.    2789.   150. o
   4   3  18     502.     487.   122. o
   5   3  18    5078.    4857.   225. o
   0   4  18     680.     917.   159. o
   1   4  18    3442.    3547.   150. o
   2   4  18     417.     664.   122. o
   3   4  18    1775.    1881.   150. o
   4   4  18     174.     122.   140. <
   5   4  18     163.     187.   150. <
   1   5  18     387.     477.   103. o
   2   5  18     404.     337.   103. o
   3   5  18    5168.    5521.   262. o
   4   5  18    2336.    1900.   206. o
   5   5  18    5619.    4894.   309. o
   0   6  18   16526.   17143.   477. o
   1   6  18   41836.   41427.   664. o
   2   6  18   22612.   23142.   468. o
   3   6  18   35045.   35372.   664. o
   4   6  18   12410.   12614.   430. o
   5   6  18   23579.   24676.   721. o
   1   7  18     842.     833.   168. o
   2   7  18     756.     814.   187. o
   3   7  18    5873.    6363.   337. o
   4   7  18    5731.    5970.   356. o
   0   8  18   42783.   42980.  1132. o
   1   8  18   92475.   90601.  1404. o
   2   8  18   35794.   35634.   711. o
   3   8  18   69478.   66954.  1123. o
   4   8  18   22960.   22777.   646. o
   1   9  18     296.     496.   168. o
   2   9  18      84.     197.   159. <
   3   9  18     495.     730.   206. o
   4   9  18     137.       9.   215. <
   0  10  18     635.     926.   262. o
   1  10  18      49.     393.   150. o
   2  10  18      18.      94.   178. <
   3  10  18     303.     880.   234. o
   4  10  18      36.    -140.   365. <
   1  11  18     743.     749.   178. o
   2  11  18    1398.    1404.   234. o
   3  11  18    3890.    3490.   328. o
   0  12  18   51369.   50784.  1170. o
   1  12  18  117343.  119077.  1862. o
   2  12  18   52495.   56193.  1095. o
   3  12  18   88739.   86362.  2059. o
   1  13  18     374.     515.   197. o
   2  13  18     814.     814.   225. o
   0  14  18    5637.    5624.   449. o
   1  14  18   27649.   29533.   711. o
   1   1  19    1362.    1479.    94. o
   2   1  19      23.       0.    75. <
   3   1  19    7360.    7056.   187. o
   4   1  19      21.      -9.    94. <
   5   1  19   13263.   13756.   374. o
   0   2  19   44582.   45357.   664. o
   1   2  19  164049.  164302.  1479. o
   2   2  19   39220.   38338.   487. o
   3   2  19  117721.  115539.  1226. o
   4   2  19   28069.   28822.   449. o
   5   2  19   59541.   59768.  1310. o
   1   3  19     687.     786.   103. o
   2   3  19    1525.    1441.   122. o
   3   3  19    3300.    3256.   168. o
   4   3  19    1071.     917.   140. o
   5   3  19    7309.    6953.   365. o
   0   4  19   34377.   34399.   646. o
   1   4  19   23114.   22458.   346. o
   2   4  19   20364.   20896.   365. o
   3   4  19   20166.   19623.   374. o
   4   4  19   23894.   23928.   543. o
   1   5  19     691.     749.   112. o
   2   5  19      28.       0.   131. <
   3   5  19    5000.    5268.   262. o
   4   5  19     189.     -28.   168. <
   0   6  19    4362.    4538.   281. o
   1   6  19   55327.   55697.   833. o
   2   6  19     838.    1085.   178. o
   3   6  19   36055.   35391.   618. o
   4   6  19     982.    1085.   187. o
   1   7  19     159.     262.   159. <
   2   7  19     432.     253.   187. <
   3   7  19    1843.    1703.   225. o
   4   7  19    1841.    1563.   234. o
   0   8  19   18490.   18921.   692. o
   1   8  19   57498.   58224.  1011. o
   2   8  19   19063.   19473.   515. o
   3   8  19   41843.   41239.   814. o
   4   8  19   10515.   12015.   636. o
   1   9  19     832.     936.   187. o
   2   9  19       2.    -225.   159. <
   3   9  19   10620.    9526.   505. o
   0  10  19    5758.    6709.   477. o
   1  10  19    4652.    5418.   290. o
   2  10  19    8634.    8431.   421. o
   3  10  19    2015.    2386.   328. o
   1  11  19     270.     197.   187. <
   2  11  19       1.      84.   225. <
   3  11  19     759.     636.   533. <
   0  12  19    4502.    4454.   402. o
   1  12  19    6595.    7037.   402. o
   2  12  19    3094.    3387.   356. o
   1  13  19    1210.    1170.   290. o
   0   0  20   11242.   11678.   430. o
   1   0  20  107203.  107436.  1413. o
   2   0  20   12684.   12408.   318. o
   3   0  20   84084.   82142.  1198. o
   4   0  20   10544.   10696.   384. o
   1   1  20     146.     243.    84. o
   2   1  20     420.     346.    84. o
   3   1  20    1572.    1703.   122. o
   4   1  20    2351.    2208.   150. o
   0   2  20   20310.   20372.   468. o
   1   2  20   13310.   13943.   281. o
   2   2  20   13455.   13222.   281. o
   3   2  20    9215.    9273.   234. o
   4   2  20   12022.   11903.   271. o
   1   3  20    1017.    1001.   112. o
   2   3  20    1181.    1319.   131. o
   3   3  20    7042.    6738.   215. o
   4   3  20    3418.    3256.   197. o
   0   4  20   12777.   12942.   393. o
   1   4  20   84944.   84360.   983. o
   2   4  20    5772.    5905.   215. o
   3   4  20   58111.   57718.   852. o
   4   4  20    3310.    3275.   234. o
   1   5  20     186.     168.   131. <
   2   5  20      90.     206.   140. <
   3   5  20    2047.    1900.   197. o
   4   5  20     792.     908.   206. o
   0   6  20    8526.    8862.   440. o
   1   6  20   42304.   43420.   664. o
   2   6  20    9010.    9620.   356. o
   3   6  20   33466.   33435.   786. o
   4   6  20    7226.    7645.   402. o
   1   7  20     878.     861.   187. o
   2   7  20     668.     711.   206. o
   3   7  20    5435.    5390.   318. o
   0   8  20   28269.   27624.   880. o
   1   8  20   12518.   13222.   505. o
   2   8  20   31287.   31320.   758. o
   3   8  20    6273.    6550.   430. o
   1   9  20     150.     393.   187. o
   2   9  20     999.    1216.   253. o
   3   9  20    1855.    1965.   402. o
   0  10  20    5605.    5680.   505. o
   1  10  20   13484.   13363.   580. o
   2  10  20    2577.    2545.   309. o
   1  11  20     271.     215.   206. <
   2  11  20    2323.    2339.   571. o
   0  12  20   65550.   66543.  1797. o
   1  12  20     105.     150.   299. <
   1   1  21      21.      66.    94. <
   2   1  21     922.     926.   112. o
   3   1  21     302.     243.   112. o
   4   1  21    1681.    1628.   178. o
   0   2  21    7439.    8001.   328. o
   1   2  21    3986.    3912.   168. o
   2   2  21    7127.    7299.   225. o
   3   2  21    4443.    4492.   187. o
   4   2  21    2365.    2583.   271. o
   1   3  21     424.     552.   122. o
   2   3  21    1709.    1516.   140. o
   3   3  21    1868.    1628.   150. o
   0   4  21     958.     786.   168. o
   1   4  21   24051.   24648.   440. o
   2   4  21    1600.    1684.   168. o
   3   4  21   18935.   19062.   459. o
   1   5  21     103.     243.   150. <
   2   5  21    4072.    3621.   225. o
   3   5  21     250.     281.   178. <
   0   6  21   38762.   38385.   926. o
   1   6  21    1141.    1132.   168. o
   2   6  21   28159.   28288.   552. o
   3   6  21    1389.    1778.   225. o
   1   7  21       3.     168.   187. <
   2   7  21    1616.    1703.   225. o
   3   7  21      21.     -28.   243. <
   0   8  21    7525.    7645.   515. o
   1   8  21   17558.   18229.   599. o
   2   8  21   11060.   11903.   543. o
   1   9  21      83.     636.   243. o
   2   9  21    1527.    1179.   346. o
   0  10  21   83633.   84874.  2199. o
   1  10  21   50868.   50110.  1076. o
   0   0  22  174112.  171723.  3444. o
   1   0  22   34959.   35765.   664. o
   2   0  22  139097.  133169.  2068. o
   3   0  22   28869.   28962.   655. o
   1   1  22       6.     -66.   103. <
   2   1  22    3453.    3350.   168. o
   3   1  22     136.     112.   112. <
   0   2  22    4433.    4707.   262. o
   1   2  22   10364.   10434.   262. o
   2   2  22    3964.    3949.   178. o
   3   2  22    7924.    7795.   253. o
   1   3  22      90.     243.   112. o
   2   3  22    1753.    1656.   159. o
   3   3  22     312.     318.   140. o
   0   4  22  100824.   99884.  1750. o
   1   4  22    3456.    3490.   206. o
   2   4  22   85771.   85417.  1348. o
   3   4  22    2947.    3228.   243. o
   1   5  22      41.    -112.   159. <
   2   5  22     907.     627.   187. o
   0   6  22   62278.   59421.  1479. o
   1   6  22    5775.    6054.   318. o
   2   6  22   52833.   53657.   917. o
   1   7  22     164.     571.   197. o
   2   7  22    1935.    1965.   318. o
   0   8  22    4373.    5493.   515. o
   1   8  22     443.     646.   243. o
   1   1  23     396.     505.   122. o
   2   1  23     608.     618.   122. o
   0   2  23   47329.   47687.   880. o
   1   2  23     322.     402.   122. o
   2   2  23   32825.   32911.   533. o
   1   3  23     323.     290.   140. o
   2   3  23     621.     487.   168. o
   0   4  23   12130.   12277.   468. o
   1   4  23   34222.   34792.   646. o
   2   4  23    6318.    6251.   365. o
   1   5  23      31.     -66.   168. <
   0   6  23   16371.   17003.   674. o
   1   6  23   17706.   17733.   608. o
   0   0  24   16250.   17050.   814. o
   1   0  24   26821.   27324.   908. o
   0   2  24    1648.    1628.   374. o
